# Supplementary material for: Polymorphism, mesomorphism and anti-oxidant character of homoleptic bis[(E)-2-(1-((o-ethylphenyl)imino)ethyl)phenolato-κ2-N,O]Ni/Cu(ii) complexes
Source: Royal Society of Chemistry journal article supplement (doi:10.1039/d3nj04915a), 2023-01-01
Supplement: d3nj04915a1.pdf [file d3nj04915a1.pdf]

Supporting Information (SI)

Polymorphism, Mesomorphism and Anti-Oxidant  
Character of Homoleptic *Bis*[(*E*)-2-(1-((*o*-  
ethylphenyl)imino)ethyl)phenolato- $\kappa^2$ -  
*N,O*]Ni/Cu(II) Complexes

Mohammed Enamullah,<sup>1,\*</sup> Afsana Mim<sup>1</sup>, Imdadul Haque<sup>1</sup>, Baldeep K. Sidhu<sup>2</sup>, Amelia  
Kacperkiewicz<sup>2</sup>, David E. Herbert<sup>2,\*</sup>

<sup>1</sup> Department of Chemistry, Jahangirnagar University, Dhaka-1342, Bangladesh;  
enamullah@juniv.edu

<sup>2</sup> Department of Chemistry and the Manitoba Institute for Materials, University of Manitoba, 144  
Dysart Road, Winnipeg, Manitoba, R3T 2N2, Canada; david.herbert@umanitoba.ca

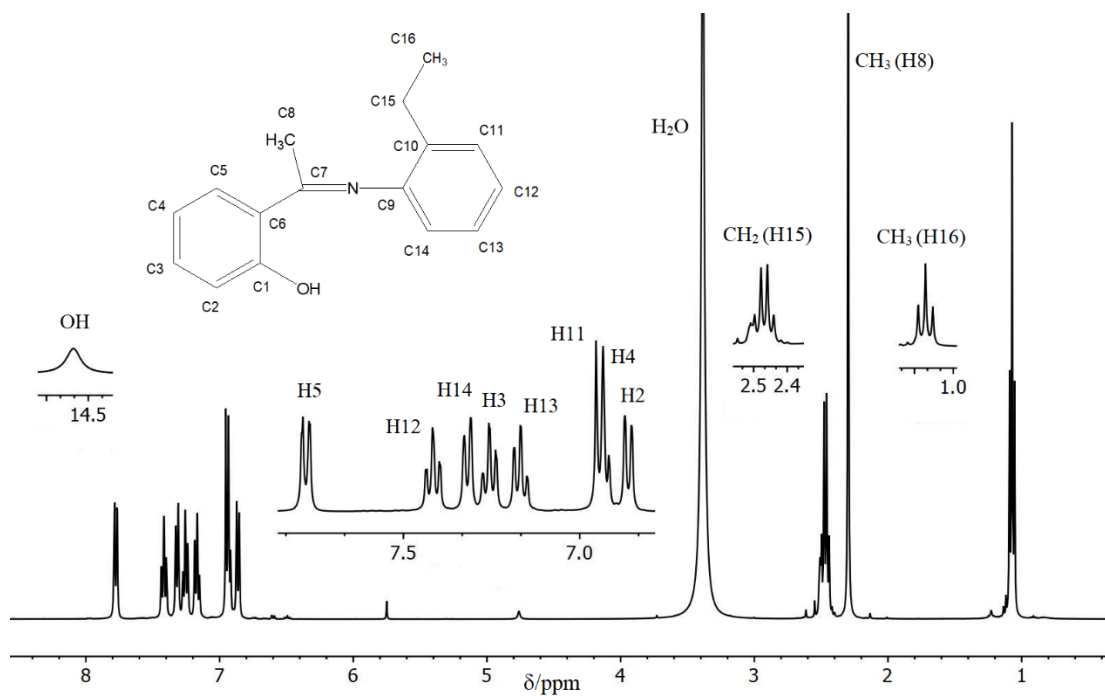

**Figure S1a.** <sup>1</sup>H NMR (400Hz) spectrum of HL in DMSO-d<sub>6</sub> solvent at 20 °C.

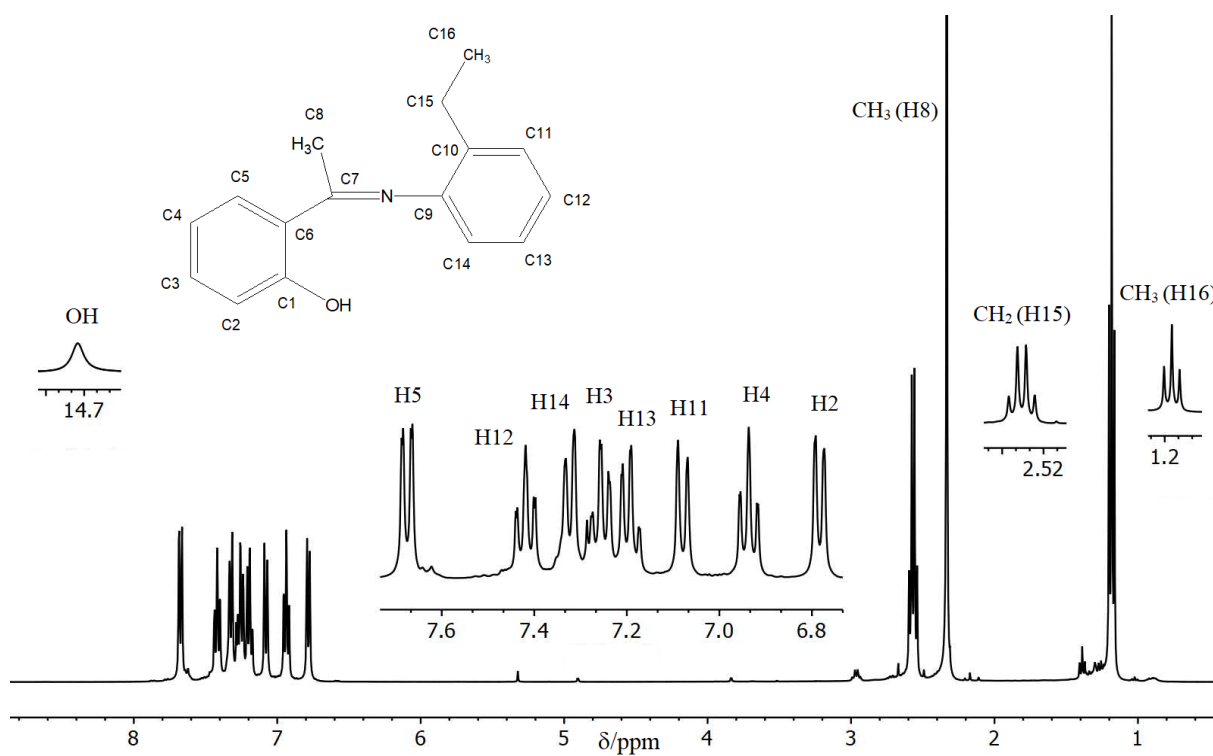

**Figure S1b.** <sup>1</sup>H NMR spectrum for HL in CDCl<sub>3</sub> at 20 °C.

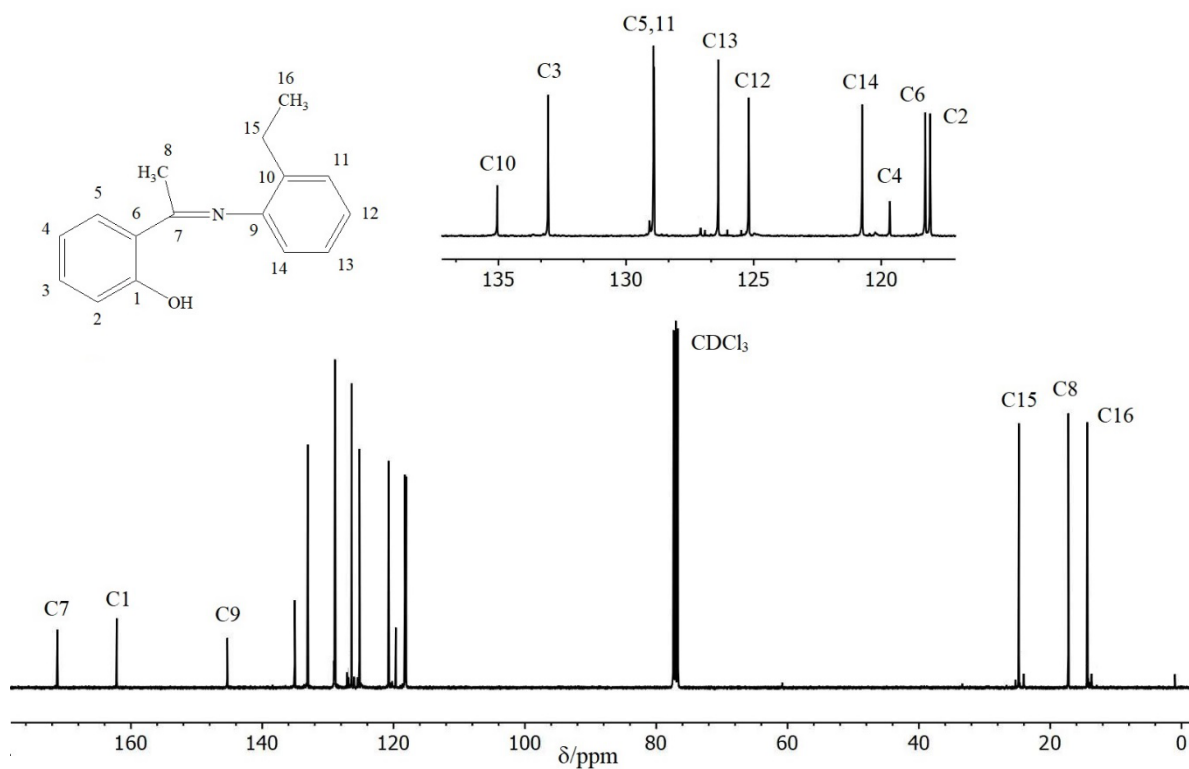

**Figure S2.**  $^{13}\text{C}$  NMR spectrum for HL in  $\text{CDCl}_3$  at 20 °C.

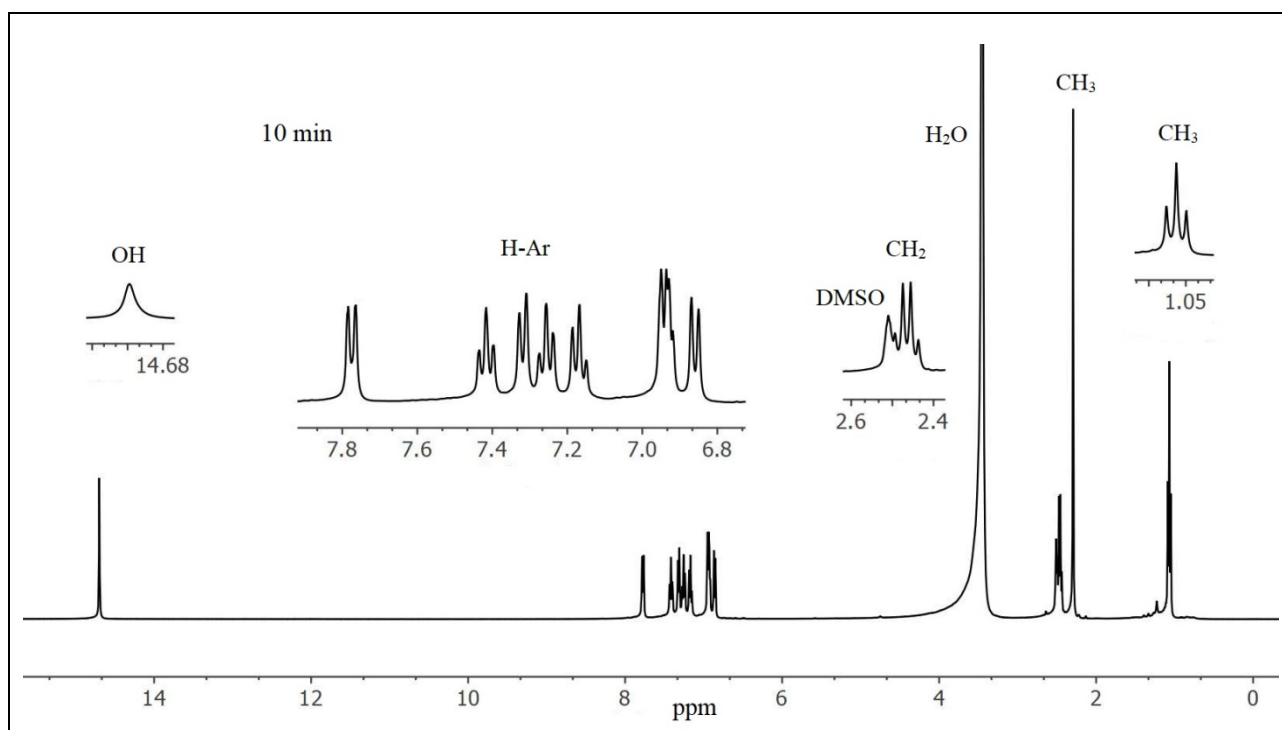

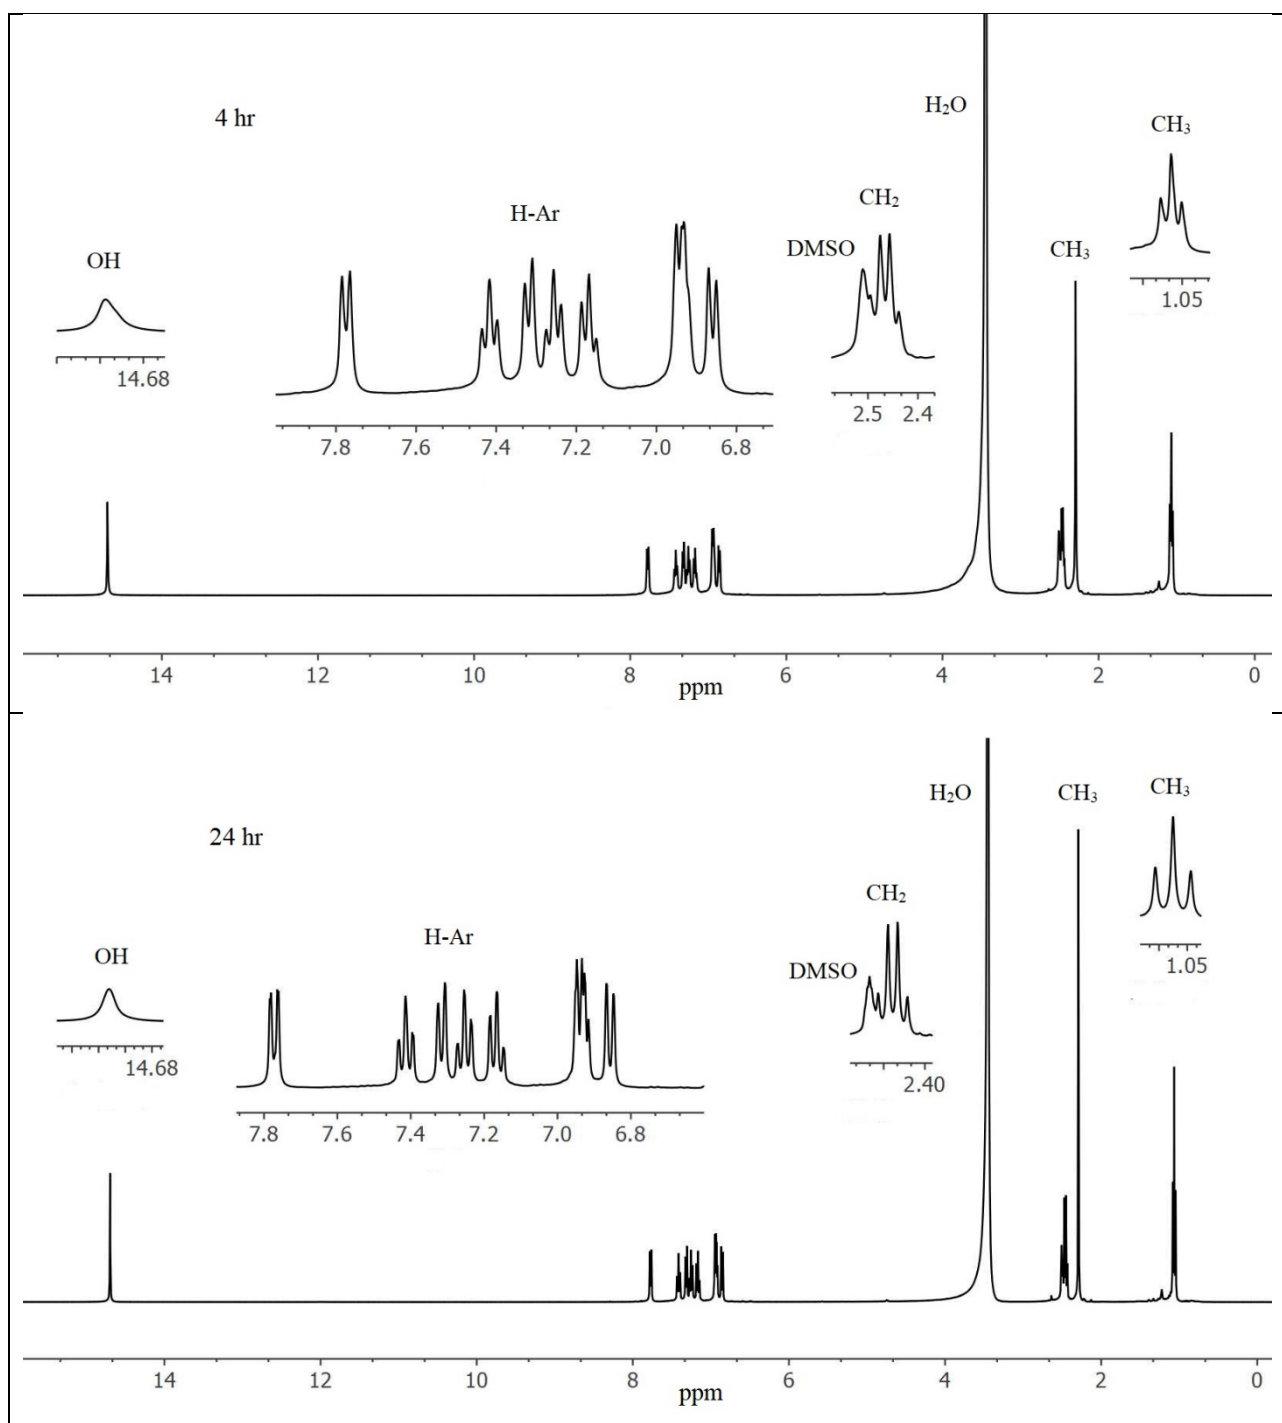

**Figure S3.**  $^1\text{H}$  NMR spectra for HL at different time intervals in  $\text{DMSO-d}_6$  at  $20^\circ\text{C}$ .

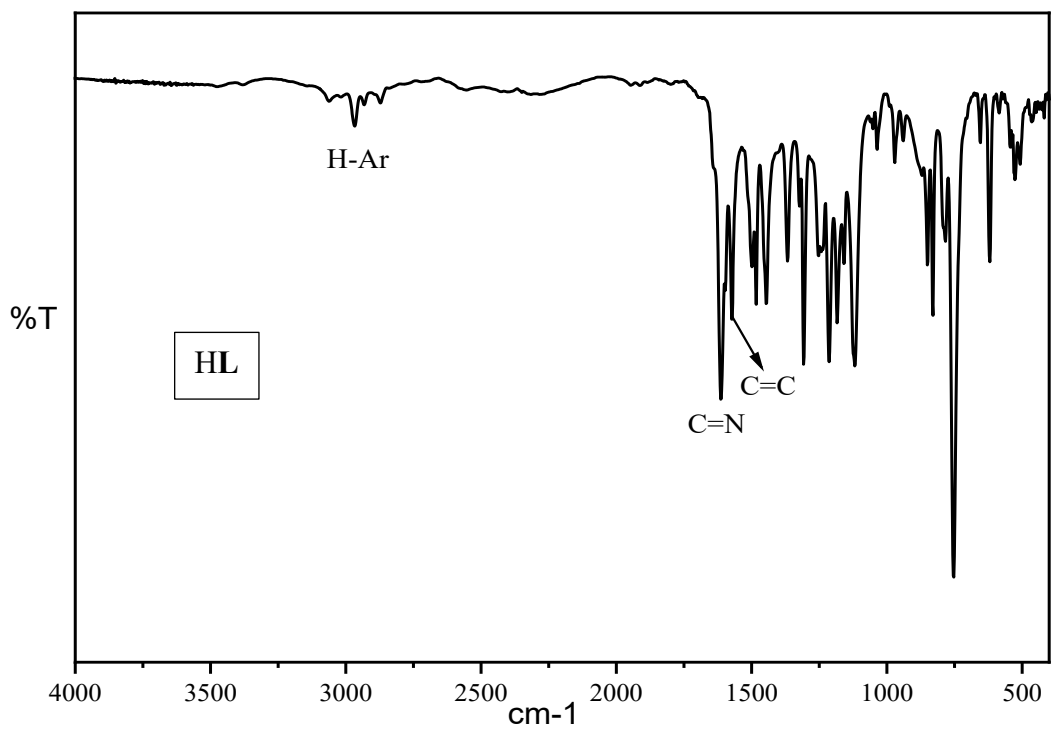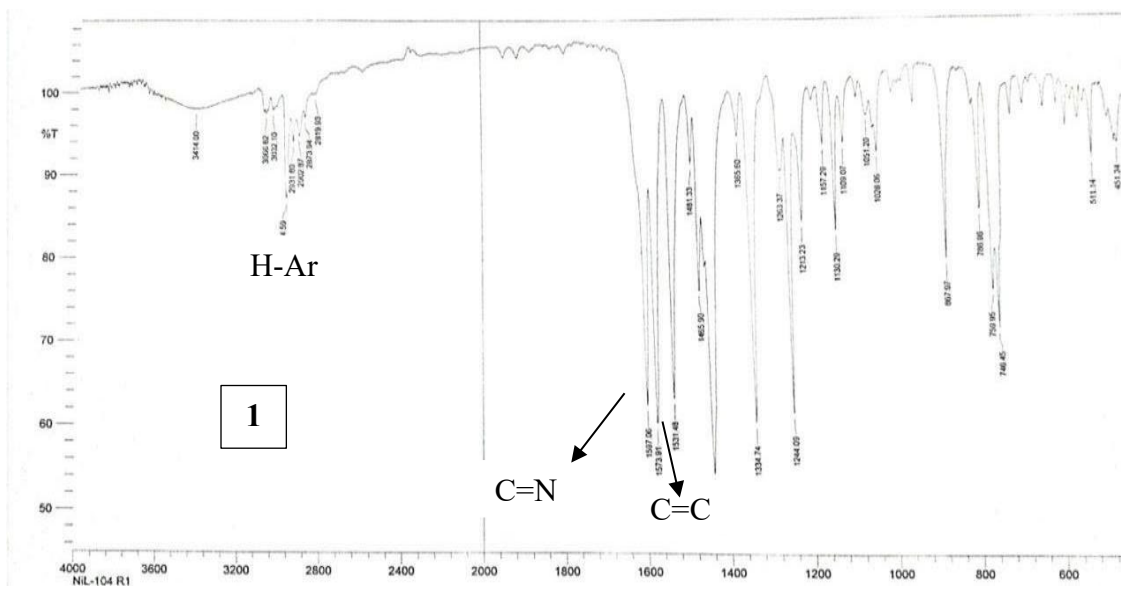

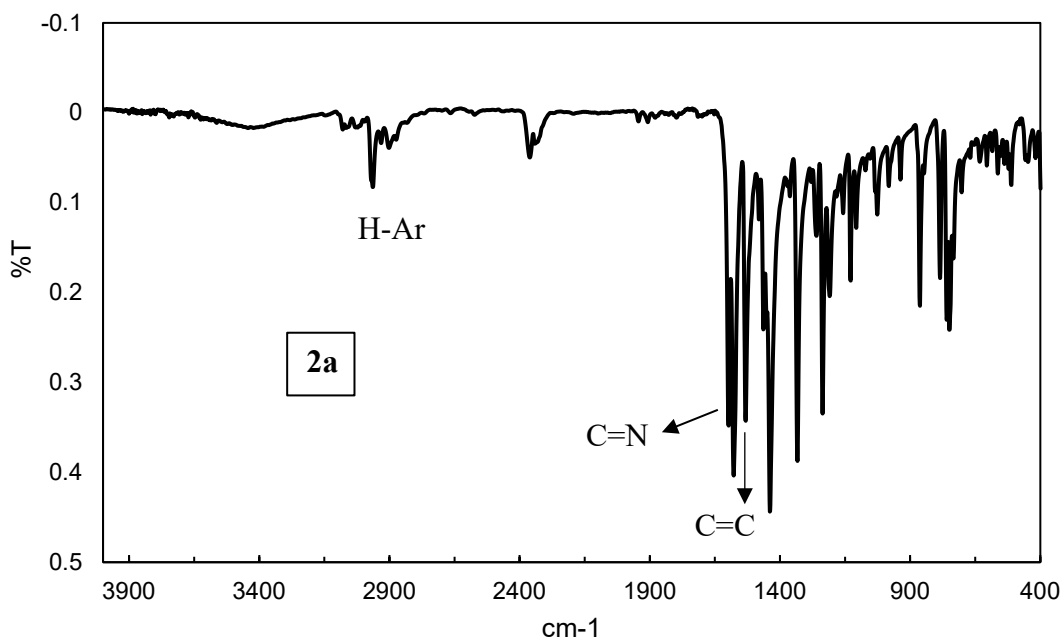

**Figure S4.** IR (KBr) spectra for HL, **1** and **2a** at ambient temperature.

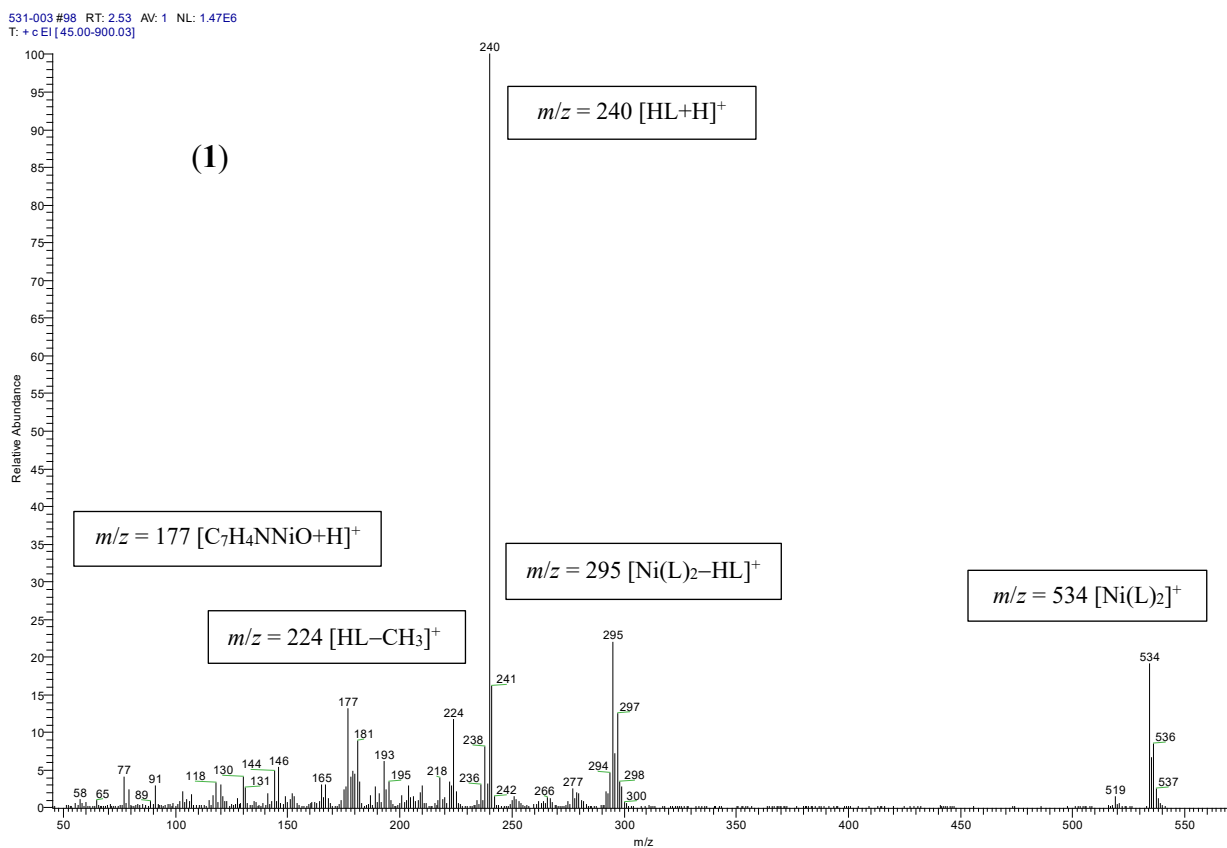

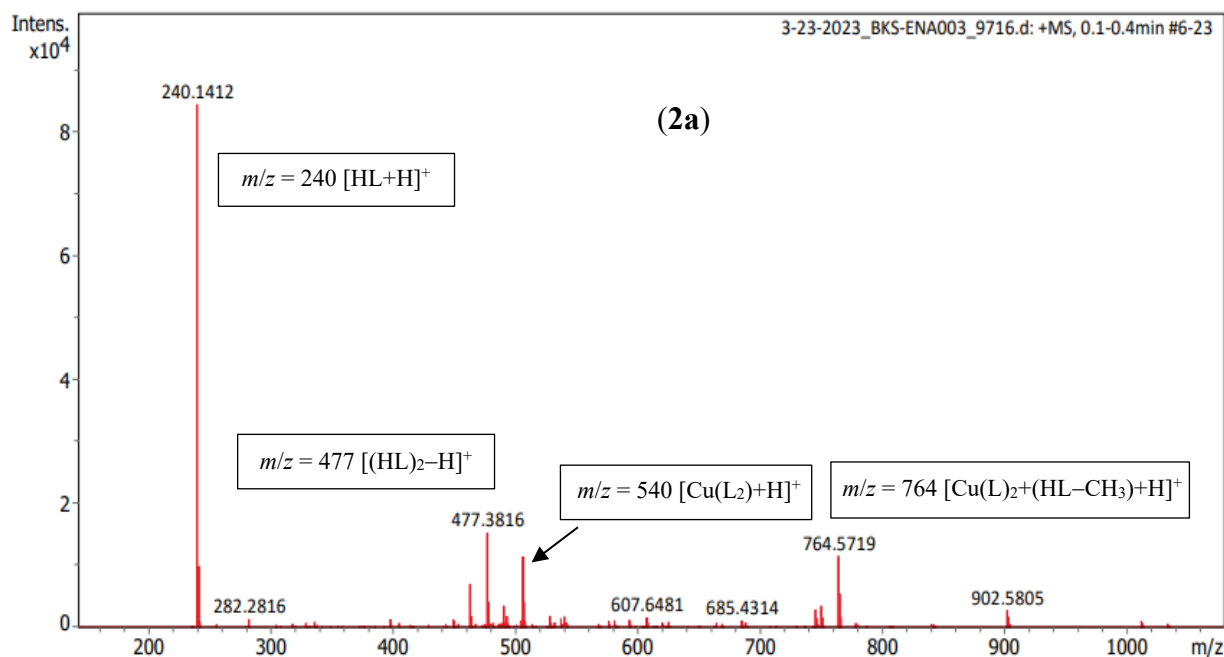

**Figure S5.** EI-mass spectrum for **1** and ESI-mass spectrum for **2a**.

### Decomplexation of the complexes with NaCN and isolation of the ligand (HL)

HL (obtained from **1**):  $^1\text{H}$  NMR (400 MHz,  $\text{CDCl}_3$ ):  $\delta/\text{ppm} = 1.18$  (t,  $J_{\text{HH}} = 7.6$  Hz, 3H,  $\text{CH}_3$ ), 2.33 (s, 3H,  $\text{H}_8$ ), 2.54-2.63 (m, 2H,  $\text{CH}_2$ ), 6.78 (dd,  $J_{\text{HH}} = 7.6, 1.6$  Hz, 1H,  $\text{H}_2$ ), 6.93 (t,  $J_{\text{HH}} = 8.4, 1.6$  Hz, 1H,  $\text{H}_4$ ), 7.07 (dd,  $J_{\text{HH}} = 8.0, 1.6$  Hz, 1H,  $\text{H}_{11}$ ), 7.19 (dt,  $J_{\text{HH}} = 7.6, 1.6$  Hz, 1H,  $\text{H}_{13}$ ), 7.25 (dt,  $J_{\text{HH}} = 7.2, 1.6$  Hz, 1H,  $\text{H}_3$ ), 7.32 (dd,  $J_{\text{HH}} = 7.6, 1.6$  Hz, 1H,  $\text{H}_{14}$ ), 7.41 (dt,  $J_{\text{HH}} = 8.8, 1.6$  Hz, 1H,  $\text{H}_{12}$ ) and 7.67 (dd,  $J_{\text{HH}} = 8.0, 1.6$  Hz, 1H,  $\text{H}_5$ ) and 14.83 (br, OH) (see Figure S6a for detailed peak assignments with hydrogen atoms numbering).

HL (obtained from **2a**):  $^1\text{H}$  NMR (400 MHz,  $\text{DMSO-d}_6$ ):  $\delta/\text{ppm} = 1.07$  (t,  $J_{\text{HH}} = 7.6$  Hz, 3H,  $\text{CH}_3$ ), 2.30 (s, 3H,  $\text{H}_8$ ), 2.47 (q,  $J_{\text{HH}} = 7.6$  Hz, 2H,  $\text{CH}_2$ ), 6.87 (dd,  $J_{\text{HH}} = 7.6, 1.6$  Hz, 1H,  $\text{H}_2$ ), 6.93 (t,  $J_{\text{HH}} = 8.0, 1.6$  Hz, 1H,  $\text{H}_4$ ), 6.94 (d,  $J_{\text{HH}} = 8.0, 1.6$  Hz, 1H,  $\text{H}_{11}$ ), 7.17 (dt,  $J_{\text{HH}} = 7.6, 1.6$  Hz, 1H,  $\text{H}_{13}$ ), 7.26 (dt,  $J_{\text{HH}} = 7.6, 1.6$  Hz, 1H,  $\text{H}_3$ ), 7.32 (dd,  $J_{\text{HH}} = 7.6, 1.6$  Hz, 1H,  $\text{H}_{14}$ ), 7.42 (dt,  $J_{\text{HH}} = 8.0, 1.6$  Hz, 1H,  $\text{H}_{12}$ ) and 7.78 (dd,  $J_{\text{HH}} = 8.4, 1.6$  Hz, 1H,  $\text{H}_5$ ) and 14.67 (br, 1H, OH) (see Figure S6b for detailed peak assignments with hydrogen atoms numbering).

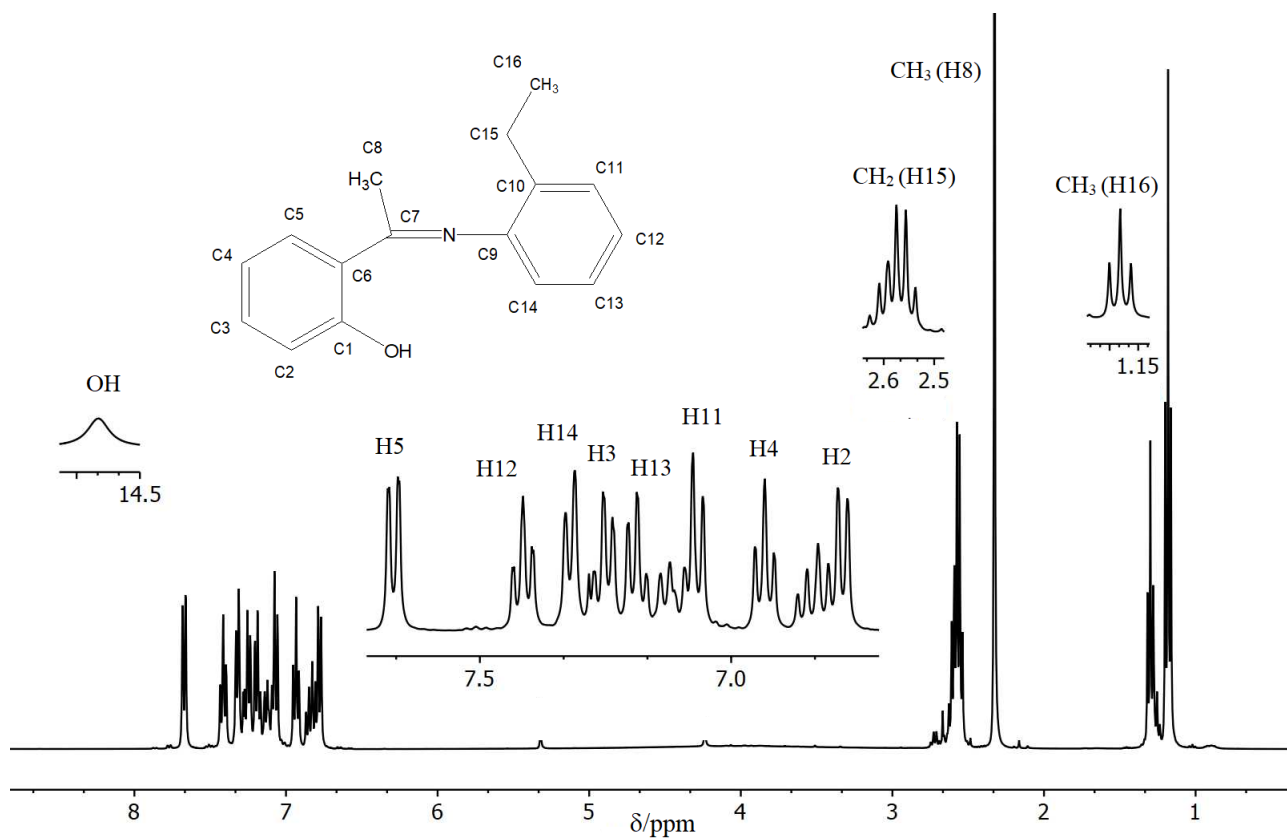

**Figure S6a.** <sup>1</sup>H NMR spectrum for HL in CDCl<sub>3</sub> at 20 °C (isolated via decomplexation of **1** with NaCN).

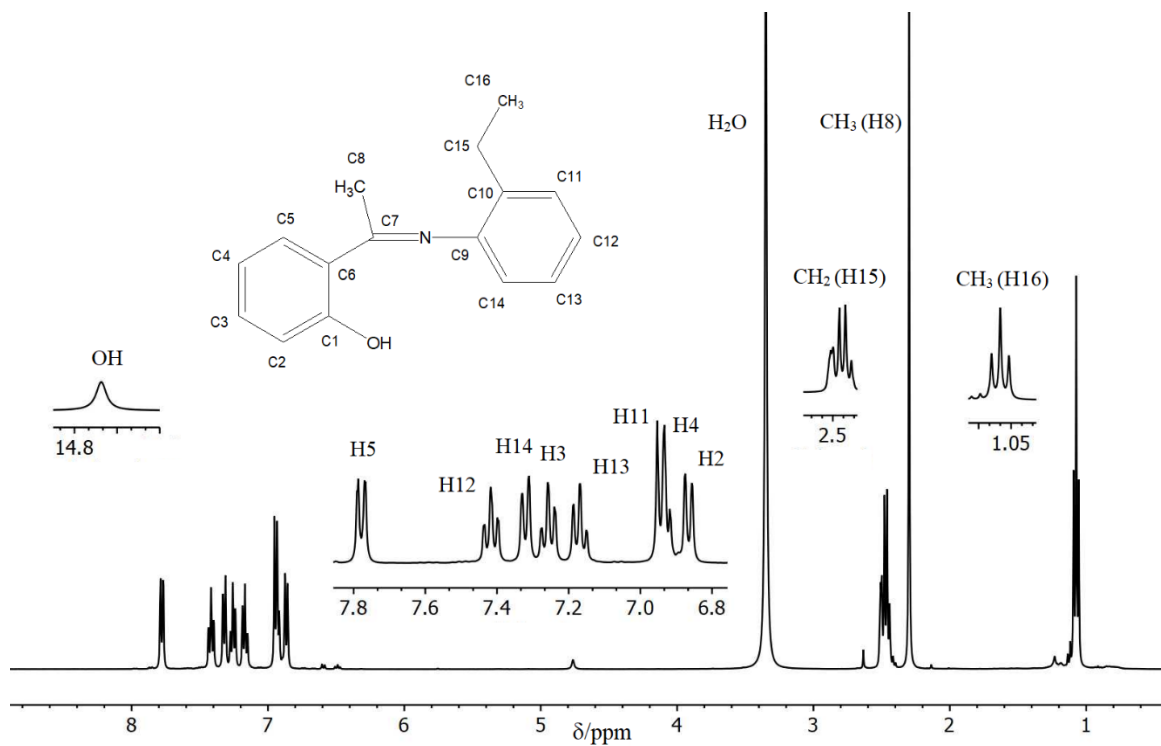

**Figure S6b.** <sup>1</sup>H NMR spectrum for HL in DMSO-d<sub>6</sub> at 20 °C (isolated via decomplexation of **2a** with NaCN).



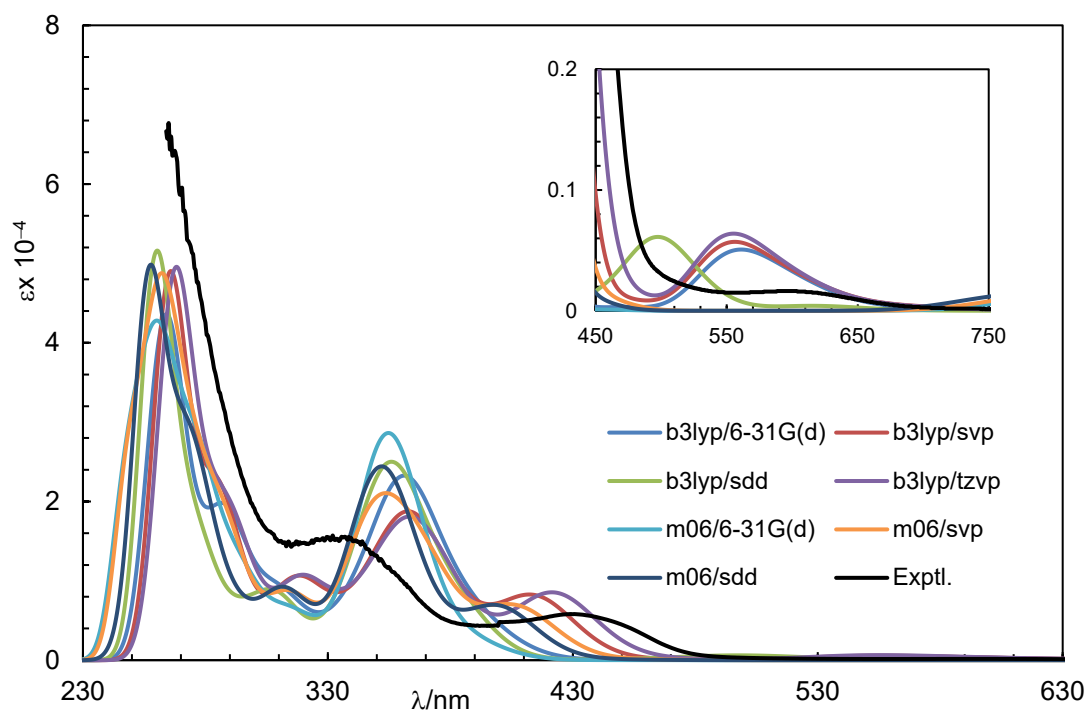

**Figure S7a.** Calculated UV/Vis spectra for **1** (HS,  $S = 1$ ,  $m = 3$ ) using PCM  $\text{CHCl}_3$ . Experimental spectrum for **1** (ca. 0.033 mM) in  $\text{CHCl}_3$ . Spectra in the visible range are shown in the inset. The Gaussian band shape with exponential half-width of  $\sigma = 0.16$  eV.

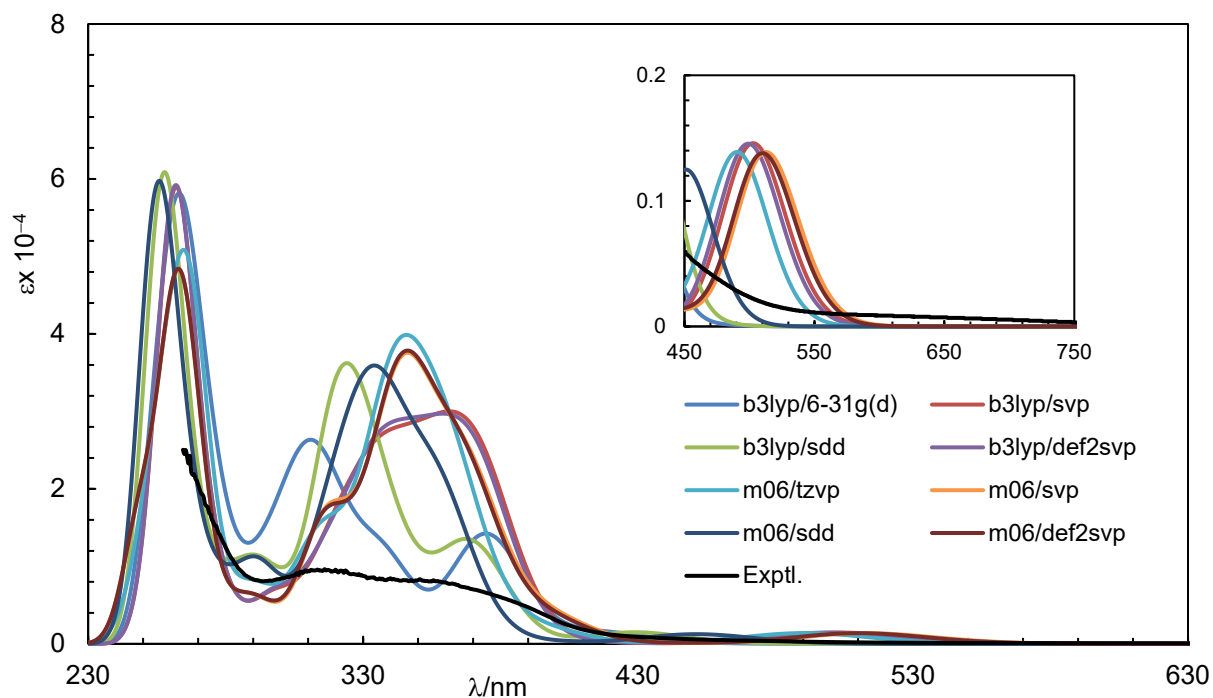

**Figure S7b.** Calculated UV-vis. spectra for **2a** using different combinations of the functionals and the basis sets with PCM in  $\text{CHCl}_3$ . Experimental spectrum (ca. 0.10 mM) in  $\text{CHCl}_3$ . Spectra in

visible range are shown in the inset. Gaussian band shape with exponential half-width of  $\sigma = 0.16$  eV.

|                                                                                                                                                                                   |                                                                                                                                                                                                                |
|-----------------------------------------------------------------------------------------------------------------------------------------------------------------------------------|----------------------------------------------------------------------------------------------------------------------------------------------------------------------------------------------------------------|
| 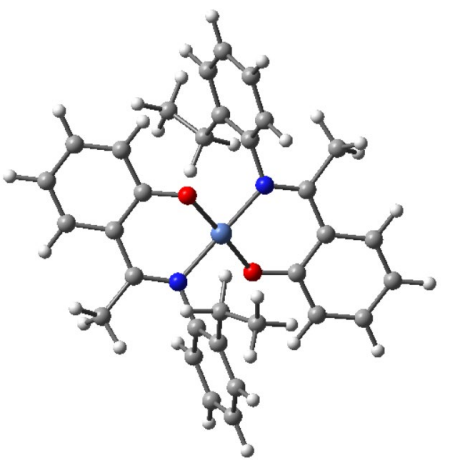 <p>Ni(II) complex (1), LS (<math>S = 0, m = 1</math>) (Molecule A)<br/>(-3006.401475 a.u.)</p>  |  <p>Ni(II) complex (1), HS (<math>S = 1, m = 3</math>), (Molecule A)<br/>(-3006.407113 a.u., stable by + 3.54 kcal/mol)</p> |
|  <p>Ni(II) complex (1), LS (<math>S = 0, m = 1</math>) (Molecule B)<br/>(-3006.401481 a.u.)</p> |  <p>Ni(II) complex (1), HS (<math>S = 1, m = 3</math>) (Molecule B)<br/>(-3006.407113 a.u., stable by + 3.53 kcal/mol)</p> |
|                                                                                                                                                                                   |                                                                                                                                                                                                                |

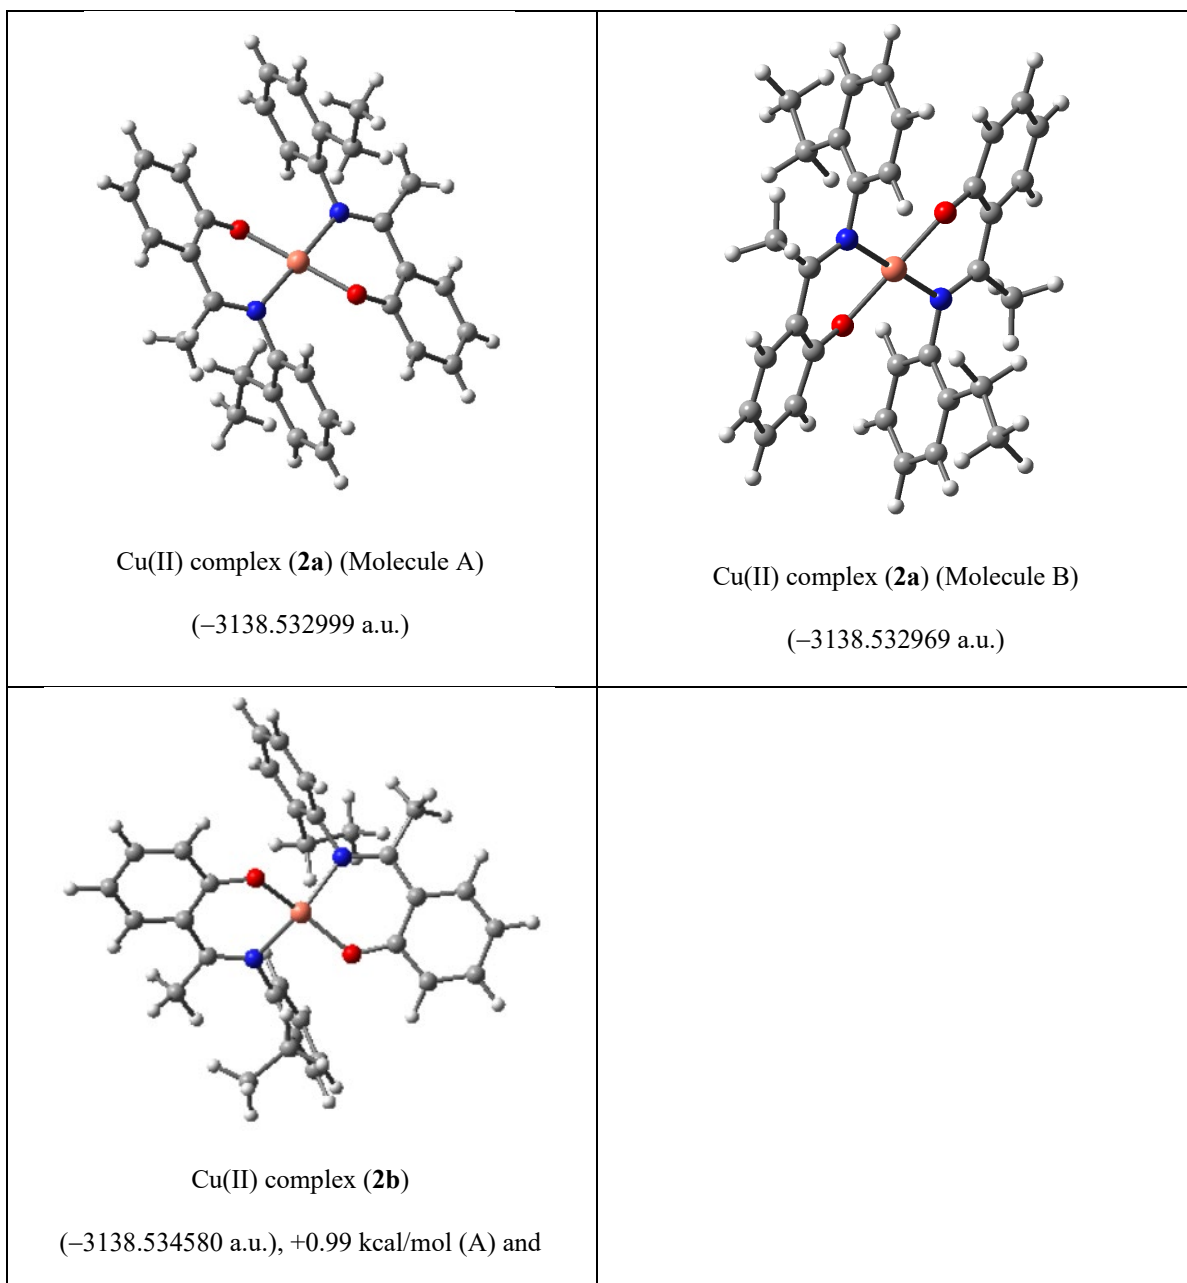

**Figure S8.** Optimized structures for compounds **1** (HS and LS), **2a** and **2b**, calculated at B3LYP/6-31G(d).

Compound **1**

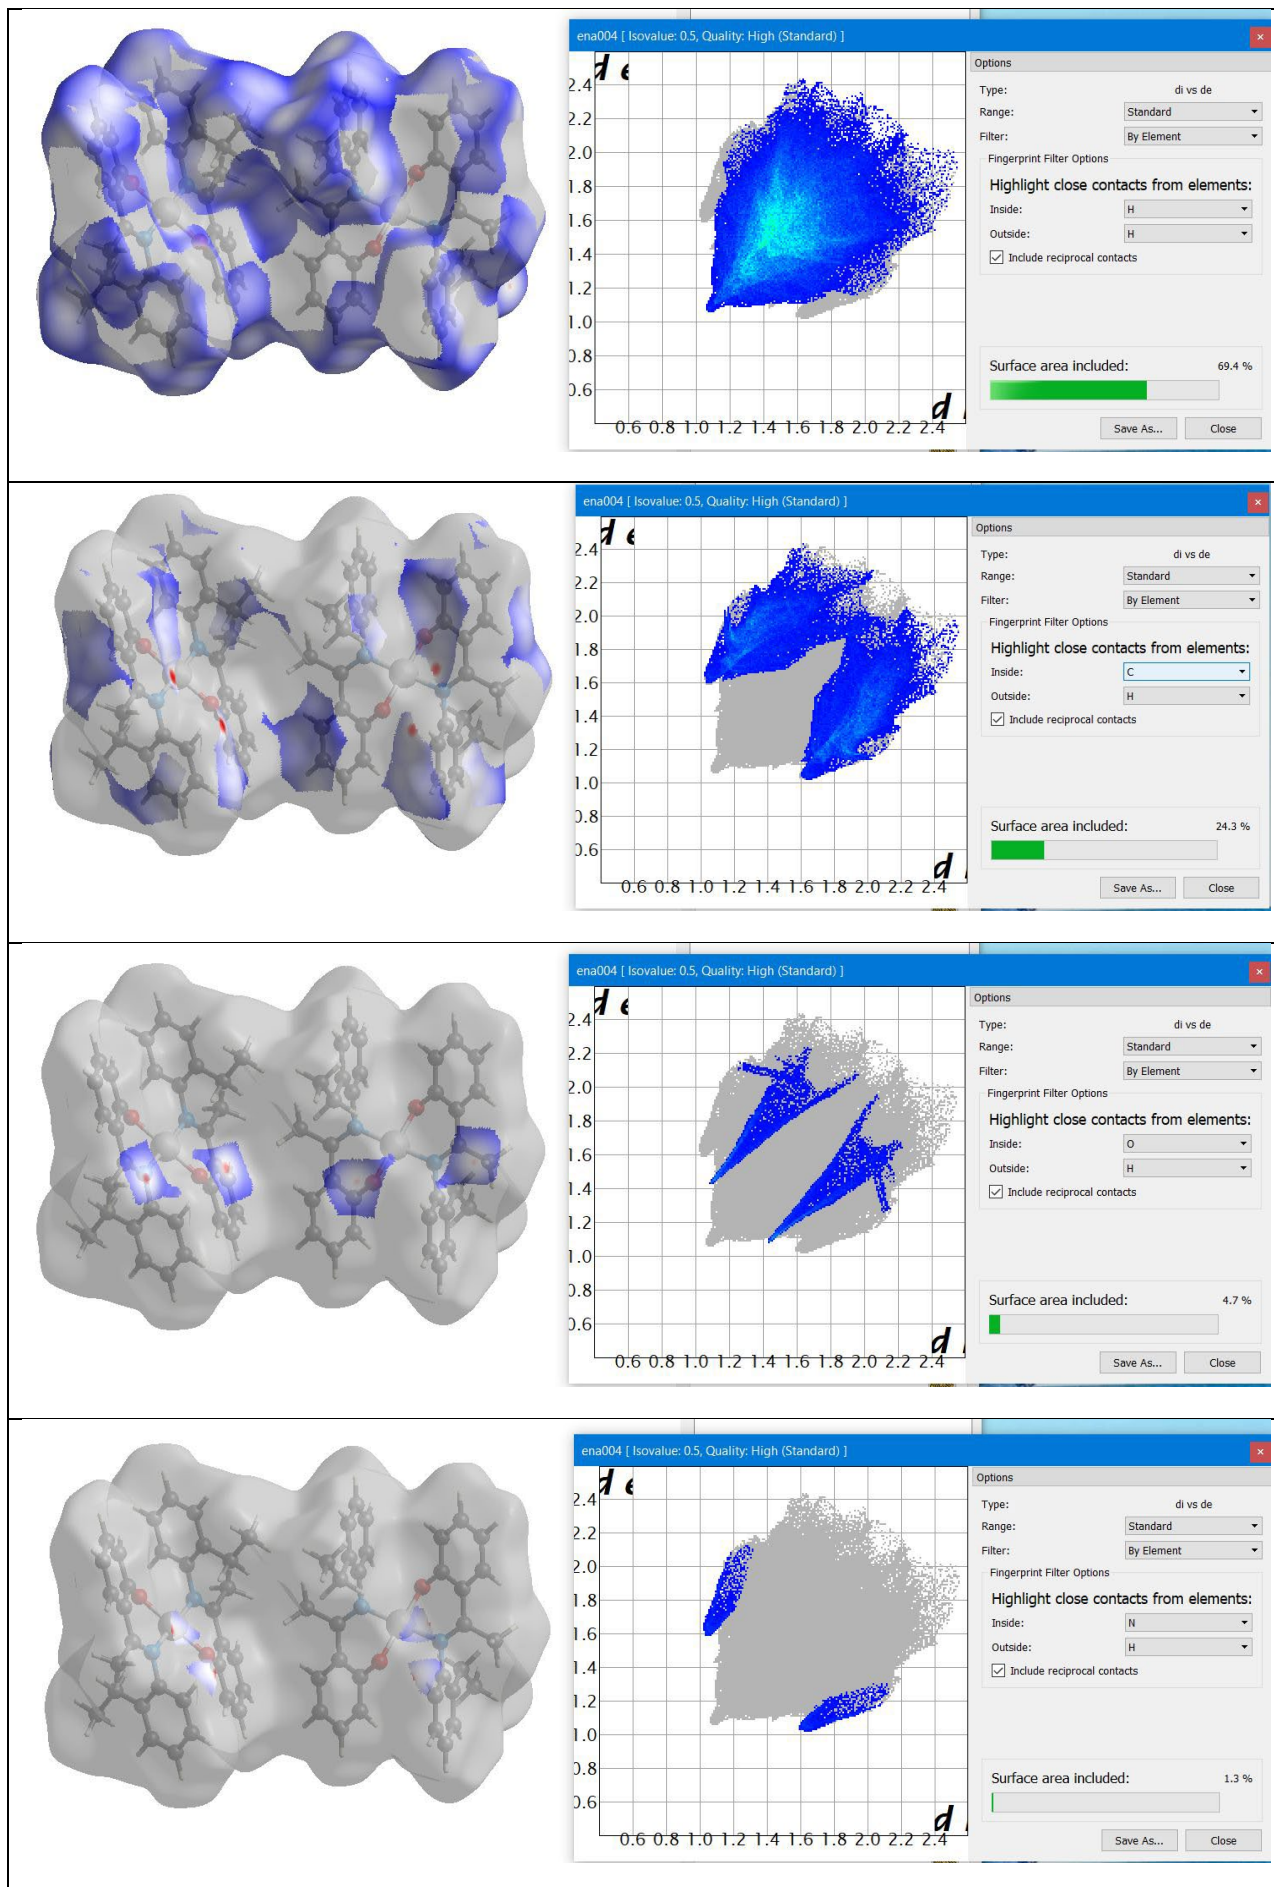

# Compound 2a

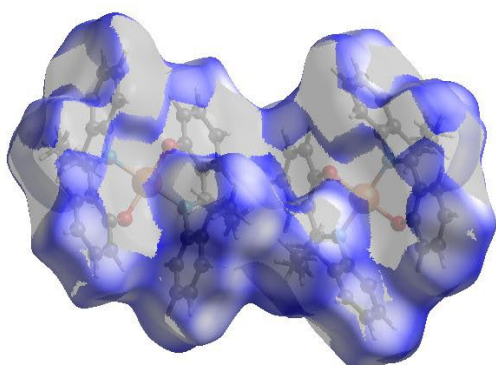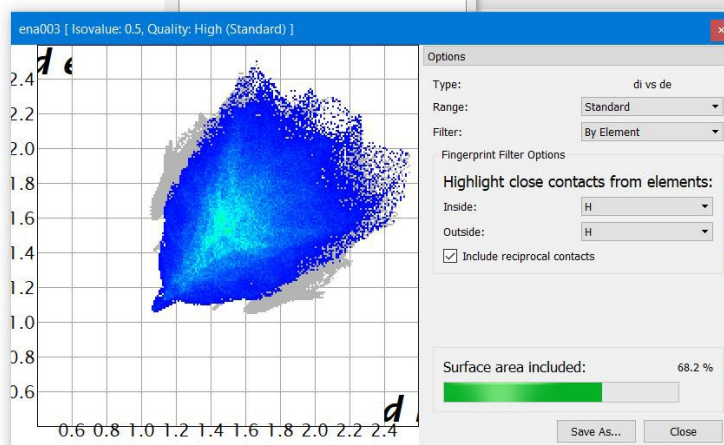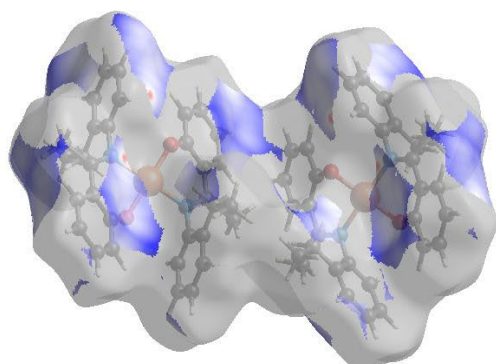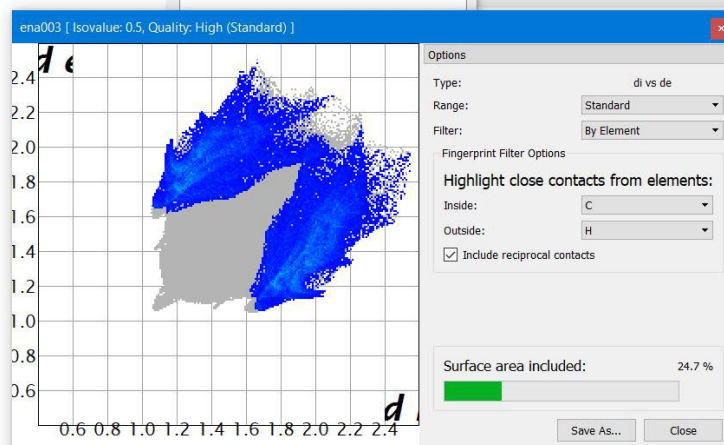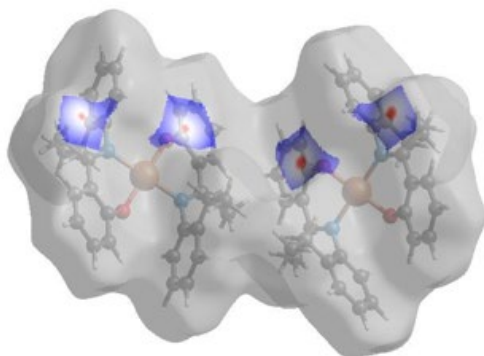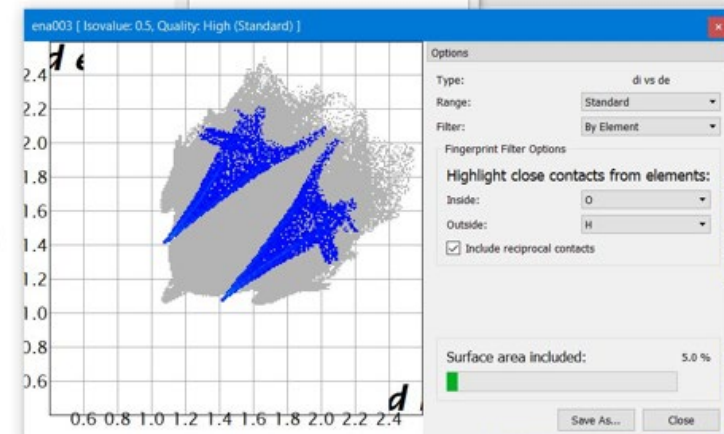

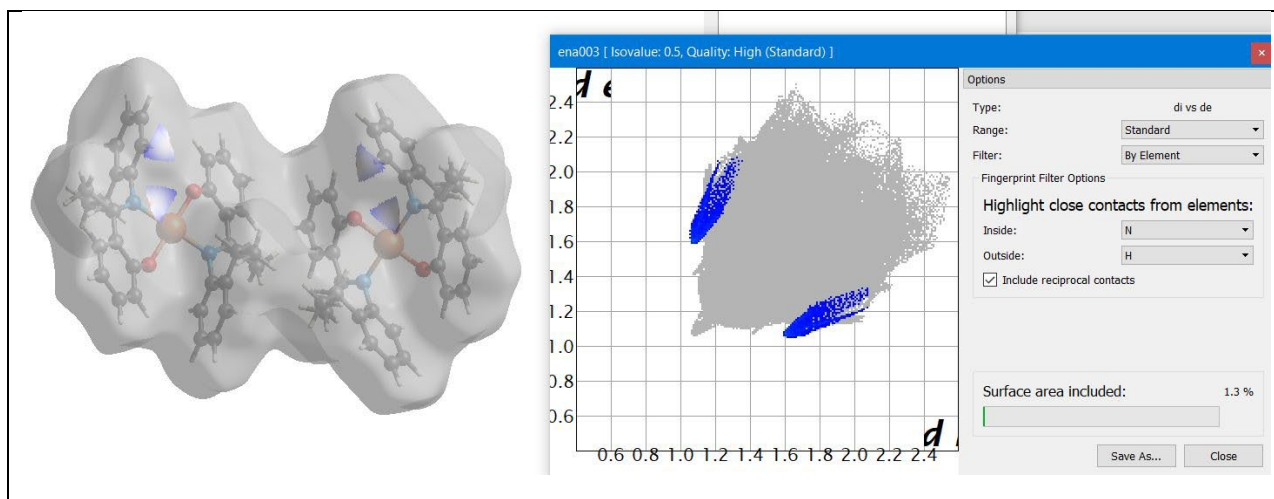

**Figure S9.** Hirshfeld surface mapped with d-norm property (right side) and 2D fingerprint plots (left side) showing breakdown of all possible contributions from close contacts. The  $d_i/d_e$  are the distances from the surface to the nearest atoms interior/exterior to the surface.

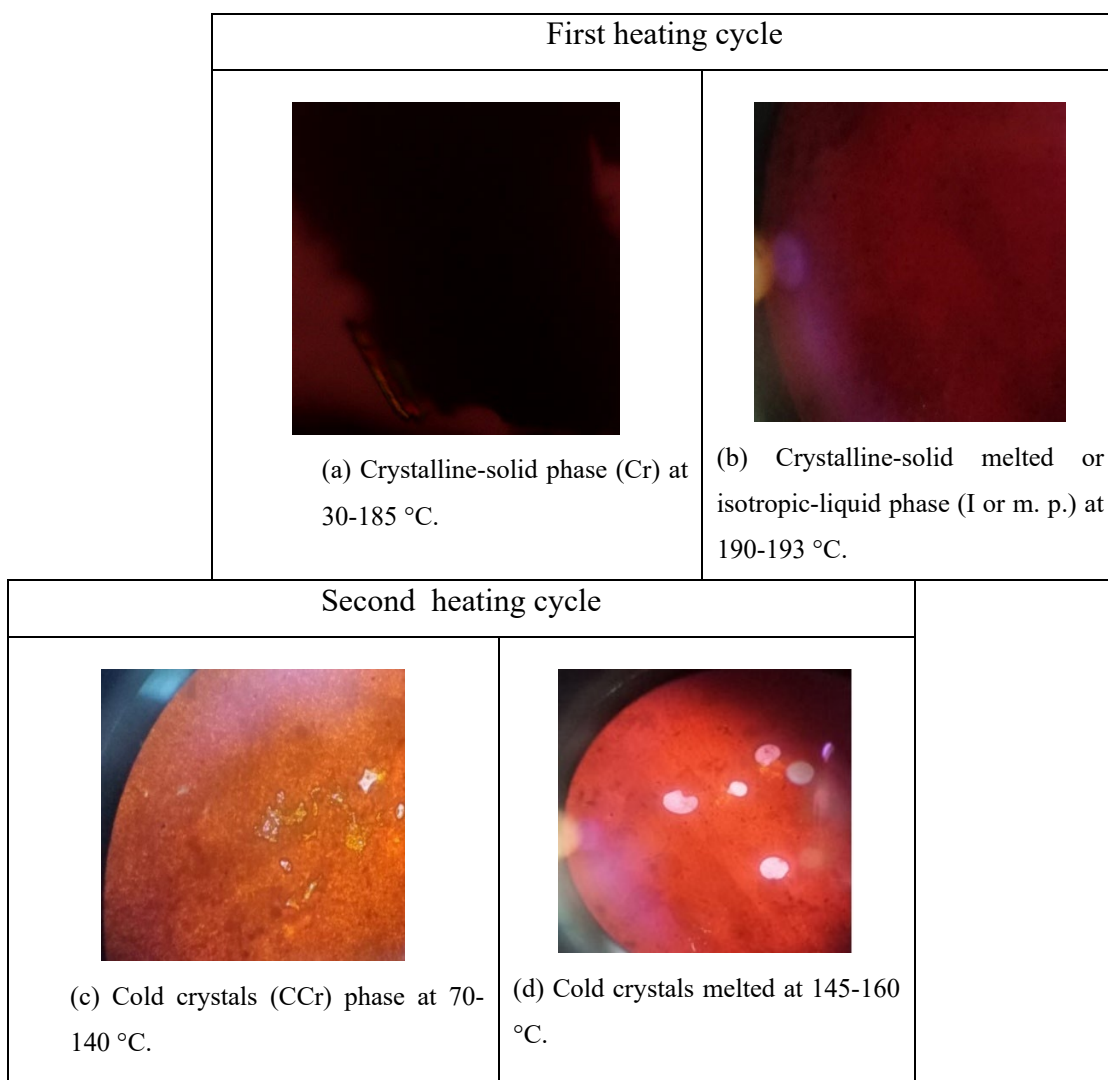

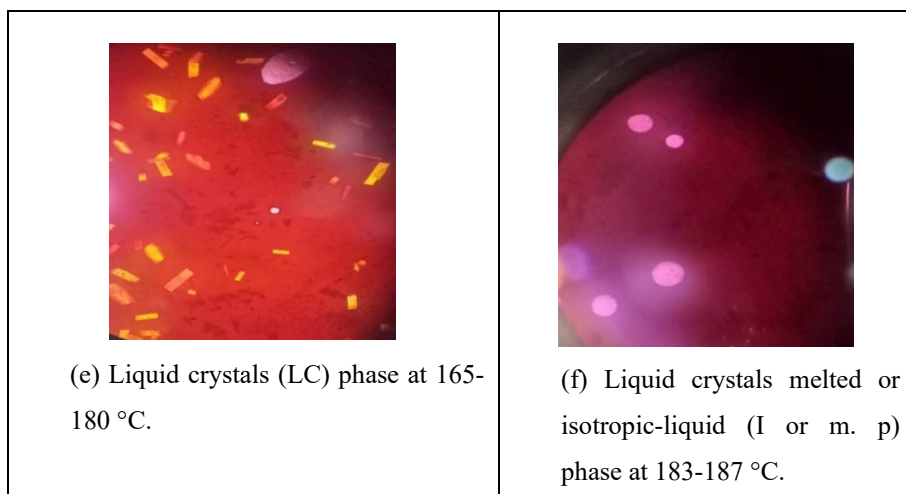

**Figure S10.** Optical texture observations under polarizing light microscopic (PLM) through second heating cycle for **2b**.

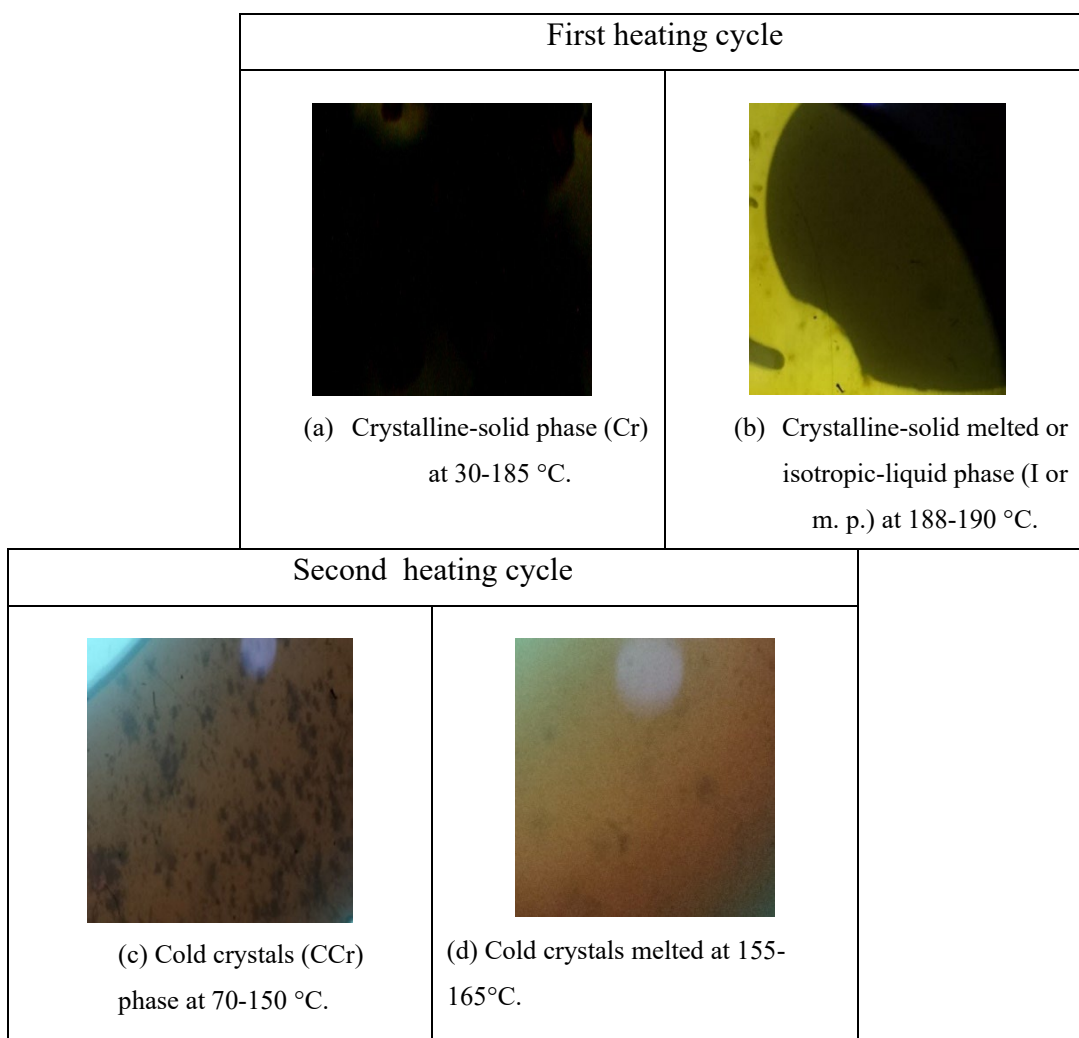

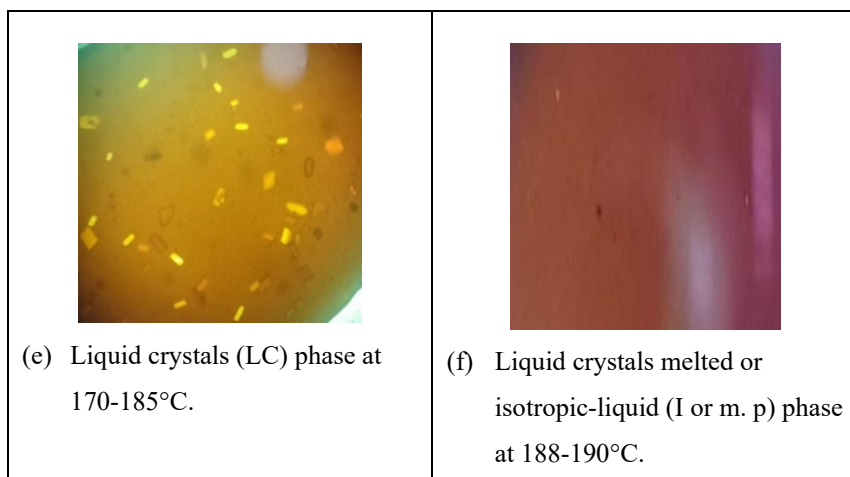

**Figure S11.** Optical texture observations through polarizing light microscope (PLM) during second heating cycle for bulk microcrystals **2**.

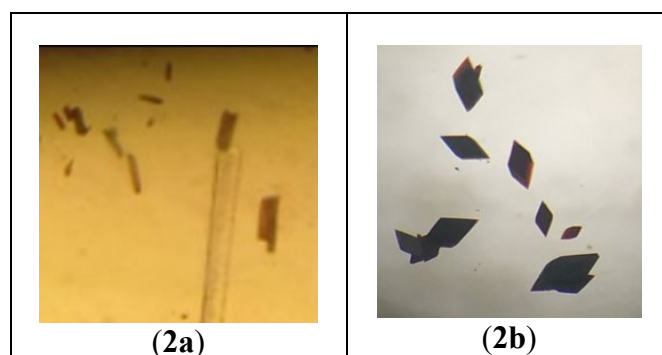

**Figure S12.** Crystals pictures of polymorphs **2a** and **2b**.

**Table S1.** Analysis of X-H...Cg( $\pi$ -Ring) Interactions ( $H..Cg < 3.0$  Ang. -  $\Gamma < 30.0$  Deg) in **1**.

-----

- Cg(J) = Center of gravity of ring J (Plane number above)  
 - H-Perp = Perpendicular distance of H to ring plane J  
 -  $\Gamma$  = Angle between Cg-H vector and ring J normal  
 - X-H..Cg = X-H-Cg angle (degrees)  
 - X..Cg = Distance of X to Cg (Angstrom)  
 - X-H, Pi = Angle of the X-H bond with the Pi-plane (i.e.' Perpendicular = 90 degrees, Parallel = 0 degrees)

| X-H(I)                                         | Res(I) | Cg(J)          | [ ARU(J)]  | H..Cg | Transformed J-Plane P, Q, R, S | H-Perp     | $\Gamma$    | X-H..Cg     | X..Cg    | X-H, Pi |
|------------------------------------------------|--------|----------------|------------|-------|--------------------------------|------------|-------------|-------------|----------|---------|
| C(2)                                           | -H(2)  | [ 1 ] -> Cg(4) | [ 2556.01] | 2.97  | 0.5186 0.3373-0.7857           | -6.6006    | 2.90 13.19  | 125         | 3.599(4) | 48      |
| C(11)                                          | -H(11) | [ 1 ] -> Cg(3) | [ 2656.01] | 2.85  | 0.4343-0.6387 0.6352           | 7.7801     | -2.84 3.19  | 141         | 3.632(4) | 47      |
| C(18)                                          | -H(18) | [ 2 ] -> Cg(8) | [ 2665.02] | 2.96  | -0.5216 0.4547-0.7219          | 2.5330     | -2.89 12.18 | 126         | 3.605(4) | 49      |
| C(27)                                          | -H(27) | [ 2 ] -> Cg(7) | [ 2765.02] | 2.79  | 0.4416 0.1609-0.8827           | 6.7484     | -2.79 3.03  | 141         | 3.579(4) | 48      |
|                                                |        |                |            | ----- |                                |            |             |             |          |         |
| Min or Max                                     |        |                |            | 2.790 |                                | -2.893 3.0 | 141.00      | 3.579 49.00 |          |         |
| [ 2556] = -X,-Y,1-Z                            |        |                |            |       |                                |            |             |             |          |         |
| [ 2656] = 1-X,-Y,1-Z                           |        |                |            |       |                                |            |             |             |          |         |
| [ 2665] = 1-X,1-Y,-Z                           |        |                |            |       |                                |            |             |             |          |         |
| [ 2765] = 2-X,1-Y,-Z                           |        |                |            |       |                                |            |             |             |          |         |
| Cg3 = centroid of ring C1-C2-C3-C4-C5-C6       |        |                |            |       |                                |            |             |             |          |         |
| Cg7 = centroid of ring C17-C18-C19-C20-C21-C22 |        |                |            |       |                                |            |             |             |          |         |

**Table S2.** Analysis of potential hydrogen bonds with  $d(D...A) < R(D)+R(A)+0.50$ ,  $d(H...A) < R(H)+R(A)-0.12$  Ang.,  $D-H...A > 100.0$  Deg in **2a**.

-----

Note: - ARU codes in [ ] are with reference to the Coordinates printed above (Possibly transformed, when MOVE .NE. 1.555)

-----

| Nr | Typ | Res | Donor | H...A | Acceptor | [ ARU ] | D - H | H...A | D...A | D - H...A | A..H..A* A'..H..A'' | Sum(XY,YZ) | Sum(XZ) |
|----|-----|-----|-------|-------|----------|---------|-------|-------|-------|-----------|---------------------|------------|---------|
|----|-----|-----|-------|-------|----------|---------|-------|-------|-------|-----------|---------------------|------------|---------|



-----  
 1 1 C(8) --H(8A) ..O(1) [ 1655.01] 0.98 2.59 3.532(3) 161

**Table S3.** Analysis of X-H...Cg( $\pi$ -Ring) Interactions (H...Cg < 3.0 Ang. - Gamma < 30.0 Deg) in **2a**.

-----

- Cg(J) = Center of gravity of ring J (Plane number above)  
 - H-Perp = Perpendicular distance of H to ring plane J  
 - Gamma = Angle between Cg-H vector and ring J normal  
 - X-H...Cg = X-H-Cg angle (degrees)  
 - X..Cg = Distance of X to Cg (Angstrom)  
 - X-H, Pi = Angle of the X-H bond with the Pi-plane (i.e.' Perpendicular = 90 degrees, Parallel = 0 degrees)

| X--H(I)                               | Res(I)     | Cg(J) [ ARU(J)] | H..Cg         | Transformed J-Plane P, Q, R, S | H-Perp | Gamma  | X-H..Cg | X..Cg    | X-H, Pi |
|---------------------------------------|------------|-----------------|---------------|--------------------------------|--------|--------|---------|----------|---------|
| C(11) -H(11) [ 1] -> Cg(3) [ 2765.01] | 2.76       | 0.4477          | 0.1704-0.8778 | 6.9010                         | -2.76  | 3.34   | 141     | 3.554(2) | 50      |
| C(27) -H(27) [ 2] -> Cg(7) [ 2656.02] | 2.83       | 0.4426-0.6342   | 0.6340        | 7.9756                         | -2.82  | 2.15   | 141     | 3.612(3) | 49      |
|                                       | -----      |                 |               |                                |        |        |         |          |         |
|                                       | Min or Max | 2.760           |               | -2.824                         | 2.2    | 141.00 |         | 3.554    | 50.00   |

[ 2765] = 2-X,1-Y,-Z

[ 2656] = 1-X,-Y,1-Z

Cg3 = centroid of ring C1-C2-C3-C4-C5-C6

Cg7 = centroid of ring C17-C18-C19-C20-C21-C22

**Table S4.** Excited states, excitation energy (eV), wavelength (nm) and oscillator strength ( $f$ ) for **1** (HS, S = 1, m = 3) at B3LYP/SVP with PCM in chloroform.

Excitation energies and oscillator strengths:

Excited State 1: 3.003-A 0.7996 eV 1550.61 nm  $f=0.0007$   $\langle S^{*2} \rangle=2.005$

123B ->141B 0.13290

128B ->141B -0.24555

130B ->141B 0.50357

130B ->143B 0.15931

131B ->141B -0.17589

134B ->141B -0.19980

135B ->141B -0.36717

135B ->143B -0.11790

136B ->141B 0.40407

136B ->143B 0.11953

140B ->141B 0.37727

140B ->143B 0.12117

This state for optimization and/or second-order correction.

Total Energy, E(TD-HF/TD-KS) = -3005.81460262

Copying the excited state density for this state as the 1-particle RhoCI density.

Excited State 2: 3.005-A 0.9819 eV 1262.72 nm f=0.0001  $\langle S^{*2} \rangle = 2.007$

|             |          |
|-------------|----------|
| 129B ->141B | -0.27636 |
| 132B ->141B | 0.33705  |
| 132B ->143B | 0.10940  |
| 135B ->141B | 0.27091  |
| 136B ->141B | 0.33322  |
| 136B ->143B | 0.11394  |
| 138B ->141B | 0.63690  |
| 138B ->143B | 0.20164  |

Excited State 3: 3.005-A 1.1634 eV 1065.71 nm f=0.0004  $\langle S^{*2} \rangle = 2.008$

|             |          |
|-------------|----------|
| 122B ->141B | -0.10477 |
| 128B ->141B | 0.30713  |
| 128B ->143B | 0.10460  |
| 129B ->142B | -0.10946 |
| 129B ->144B | 0.15704  |
| 130B ->141B | 0.28527  |
| 131B ->141B | 0.29273  |
| 132B ->141B | -0.13977 |
| 132B ->142B | 0.13572  |
| 132B ->144B | -0.18846 |
| 133B ->141B | -0.10676 |
| 134B ->141B | 0.20001  |
| 135B ->142B | 0.11006  |
| 135B ->144B | -0.15183 |
| 136B ->142B | 0.13000  |
| 136B ->144B | -0.17527 |
| 137B ->141B | 0.34004  |
| 137B ->143B | 0.10710  |
| 138B ->142B | 0.25482  |
| 138B ->144B | -0.33166 |
| 138B ->148B | -0.14933 |

140B ->141B -0.13861

Excited State 4: 3.006-A 1.8002 eV 688.74 nm f=0.0003 <S\*\*2>=2.009

128B ->142B -0.13541

128B ->144B 0.19602

130B ->142B -0.37079

130B ->144B 0.48636

130B ->148B 0.21976

131B ->142B -0.15528

131B ->144B 0.19278

132B ->144B -0.12565

134B ->144B 0.10231

135B ->144B -0.11271

136B ->142B -0.11521

136B ->144B 0.13990

137B ->142B -0.28240

137B ->144B 0.35447

137B ->148B 0.14834

Excited State 5: 3.010-A 2.0571 eV 602.72 nm f=0.0020 <S\*\*2>=2.015

128B ->141B 0.18540

129B ->142B 0.10550

129B ->144B -0.16182

130B ->141B 0.36727

130B ->143B 0.10715

131B ->141B 0.22651

132B ->141B -0.11181

132B ->142B -0.14713

132B ->144B 0.19749

134B ->141B 0.13544

135B ->142B -0.13188

135B ->144B 0.17207

|             |          |
|-------------|----------|
| 136B ->142B | -0.13782 |
| 136B ->144B | 0.18188  |
| 137B ->141B | 0.34155  |
| 137B ->143B | 0.10691  |
| 138B ->142B | -0.31881 |
| 138B ->144B | 0.38360  |
| 138B ->148B | 0.15457  |

Excited State 6: 3.057-A 2.2506 eV 550.89 nm f=0.0051 <S\*\*2>=2.086

|             |          |
|-------------|----------|
| 141A ->144A | -0.10318 |
| 128B ->142B | -0.18160 |
| 128B ->144B | 0.24789  |
| 128B ->148B | 0.11507  |
| 130B ->142B | 0.13879  |
| 130B ->144B | -0.18863 |
| 131B ->142B | -0.18688 |
| 131B ->144B | 0.22062  |
| 131B ->148B | 0.10114  |
| 134B ->142B | -0.16514 |
| 134B ->144B | 0.19714  |
| 135B ->142B | -0.18392 |
| 135B ->144B | 0.22039  |
| 136B ->142B | 0.22604  |
| 136B ->144B | -0.27774 |
| 136B ->148B | -0.11312 |
| 138B ->141B | 0.13315  |
| 140B ->142B | 0.38739  |
| 140B ->144B | -0.32669 |
| 140B ->148B | -0.11955 |

Excited State 7: 4.001-A 2.6178 eV 473.62 nm f=0.0007 <S\*\*2>=3.752

|             |         |
|-------------|---------|
| 140A ->143A | 0.20473 |
|-------------|---------|

|             |          |
|-------------|----------|
| 141A ->143A | 0.45671  |
| 141A ->144A | -0.13209 |
| 142A ->144A | 0.49242  |
| 139B ->142B | 0.42835  |
| 139B ->144B | 0.10558  |
| 140B ->141B | -0.24013 |
| 140B ->142B | 0.15888  |
| 140B ->143B | 0.39928  |

Excited State 8: 3.975-A 2.6378 eV 470.02 nm f=0.0001 <S\*\*2>=3.700

|             |          |
|-------------|----------|
| 140A ->144A | 0.21133  |
| 141A ->143A | -0.15536 |
| 141A ->144A | 0.37369  |
| 142A ->143A | 0.49882  |
| 142A ->144A | 0.20340  |
| 139B ->141B | 0.24244  |
| 139B ->143B | -0.35004 |
| 140B ->141B | -0.10153 |
| 140B ->142B | -0.36702 |
| 140B ->143B | 0.15076  |
| 140B ->144B | -0.23747 |

Excited State 9: 3.134-A 2.9586 eV 419.06 nm f=0.0117 <S\*\*2>=2.205

|             |         |
|-------------|---------|
| 139B ->141B | 0.89334 |
| 139B ->143B | 0.24582 |
| 140B ->142B | 0.13080 |

Excited State 10: 3.147-A 2.9955 eV 413.90 nm f=0.0647 <S\*\*2>=2.226

|             |          |
|-------------|----------|
| 128B ->141B | 0.11383  |
| 130B ->141B | -0.10663 |
| 134B ->141B | 0.12742  |
| 135B ->141B | 0.20195  |

136B ->141B -0.17493  
136B ->143B -0.14126  
139B ->142B 0.14426  
140B ->141B 0.81405  
140B ->143B 0.21516

Excited State 11: 3.325-A 3.0964 eV 400.41 nm f=0.0019 <S\*\*2>=2.514

139A ->143A -0.20754  
139A ->144A 0.14757  
140A ->143A -0.34536  
140A ->144A 0.31586  
141A ->143A 0.43533  
141A ->144A -0.43233  
142A ->143A 0.38076  
142A ->144A -0.34680  
140B ->142B -0.14023

Excited State 12: 3.309-A 3.1184 eV 397.59 nm f=0.0027 <S\*\*2>=2.487

139A ->143A 0.13085  
139A ->144A 0.19102  
140A ->143A -0.36480  
140A ->144A -0.37421  
141A ->143A 0.51450  
141A ->144A 0.56439  
140B ->142B 0.10597  
140B ->143B -0.14358

Excited State 13: 3.589-A 3.2489 eV 381.62 nm f=0.0180 <S\*\*2>=2.970

135A ->143A -0.13631  
135A ->144A 0.15510  
136A ->143A 0.12620  
138A ->143A -0.19330

|             |          |
|-------------|----------|
| 138A ->144A | 0.12342  |
| 139A ->144A | 0.12034  |
| 141A ->143A | -0.18330 |
| 141A ->144A | 0.17011  |
| 142A ->144A | -0.18944 |
| 133B ->142B | -0.10448 |
| 135B ->142B | -0.11921 |
| 135B ->144B | -0.12098 |
| 136B ->143B | 0.11708  |
| 137B ->142B | 0.18614  |
| 137B ->143B | 0.13688  |
| 138B ->142B | -0.13633 |
| 138B ->144B | -0.14272 |
| 139B ->142B | 0.61556  |
| 139B ->144B | -0.20415 |
| 140B ->142B | 0.10801  |
| 140B ->150B | -0.10608 |

Excited State 14: 3.564-A 3.2698 eV 379.17 nm f=0.0200 <S\*\*2>=2.926

|             |          |
|-------------|----------|
| 135A ->143A | -0.12005 |
| 136A ->144A | -0.14367 |
| 137A ->143A | 0.15427  |
| 137A ->144A | 0.14416  |
| 138A ->144A | 0.10934  |
| 139A ->143A | -0.14490 |
| 141A ->143A | -0.14362 |
| 142A ->143A | 0.38702  |
| 142A ->144A | 0.11952  |
| 130B ->142B | -0.10670 |
| 132B ->143B | 0.12529  |
| 134B ->143B | -0.10072 |
| 135B ->144B | -0.13360 |

|             |          |
|-------------|----------|
| 136B ->143B | -0.15181 |
| 136B ->144B | 0.17204  |
| 137B ->142B | 0.12122  |
| 139B ->142B | -0.25993 |
| 139B ->144B | 0.11725  |
| 140B ->142B | 0.59594  |

Excited State 15: 3.830-A 3.3488 eV 370.23 nm f=0.0240 <S\*\*2>=3.418

|             |          |
|-------------|----------|
| 135A ->143A | 0.13650  |
| 136A ->143A | 0.12085  |
| 136A ->144A | 0.19708  |
| 137A ->143A | -0.21509 |
| 137A ->144A | -0.24126 |
| 138A ->144A | -0.13577 |
| 140A ->144A | 0.11670  |
| 141A ->144A | 0.11688  |
| 142A ->143A | 0.19950  |
| 142A ->144A | -0.13755 |
| 142A ->149A | -0.10574 |
| 142A ->150A | -0.10556 |
| 132B ->143B | -0.16173 |
| 136B ->141B | -0.16521 |
| 136B ->142B | -0.19949 |
| 136B ->143B | 0.25334  |
| 137B ->142B | -0.12255 |
| 138B ->143B | 0.14596  |
| 139B ->141B | -0.13787 |
| 139B ->142B | -0.19172 |
| 139B ->143B | -0.17725 |
| 140B ->142B | 0.39552  |
| 140B ->143B | 0.24074  |
| 140B ->149B | -0.11836 |



Excited State 16: 3.594-A 3.3769 eV 367.15 nm f=0.0446 <S\*\*2>=2.980

|             |          |
|-------------|----------|
| 135A ->143A | 0.15906  |
| 135A ->144A | -0.16147 |
| 136A ->143A | -0.12689 |
| 138A ->143A | 0.21002  |
| 138A ->144A | -0.13705 |
| 139A ->144A | -0.11316 |
| 141A ->143A | -0.16108 |
| 142A ->143A | 0.27186  |
| 134B ->142B | 0.13082  |
| 135B ->141B | -0.10111 |
| 135B ->142B | 0.16831  |
| 137B ->142B | -0.14633 |
| 137B ->143B | -0.10207 |
| 138B ->142B | 0.20230  |
| 139B ->142B | 0.42542  |
| 139B ->144B | -0.24304 |
| 140B ->141B | -0.12511 |
| 140B ->142B | 0.17094  |
| 140B ->143B | -0.33052 |

Excited State 17: 3.536-A 3.4389 eV 360.54 nm f=0.0859 <S\*\*2>=2.876

|             |          |
|-------------|----------|
| 137A ->144A | 0.11457  |
| 141A ->144A | 0.14606  |
| 142A ->143A | -0.10623 |
| 142A ->144A | -0.56985 |
| 140B ->141B | -0.22336 |
| 140B ->143B | 0.64737  |

Excited State 18: 3.254-A 3.5290 eV 351.32 nm f=0.0194 <S\*\*2>=2.397

|             |          |
|-------------|----------|
| 140A ->144A | -0.22741 |
|-------------|----------|

|             |          |
|-------------|----------|
| 141A ->143A | -0.14058 |
| 142A ->143A | 0.37698  |
| 142A ->144A | 0.14413  |
| 131B ->142B | -0.10044 |
| 139B ->141B | -0.17999 |
| 139B ->143B | 0.72539  |
| 140B ->142B | -0.16403 |
| 140B ->143B | 0.17673  |

Excited State 19: 3.668-A 3.5583 eV 348.44 nm f=0.0032 <S\*\*2>=3.113

|             |          |
|-------------|----------|
| 134A ->147A | -0.10123 |
| 136A ->146A | -0.11591 |
| 138A ->146A | -0.10316 |
| 139A ->147A | -0.10974 |
| 139A ->148A | 0.15284  |
| 140A ->143A | 0.38144  |
| 140A ->144A | -0.36749 |
| 140A ->146A | -0.10805 |
| 140A ->147A | -0.12108 |
| 141A ->143A | 0.14317  |
| 141A ->144A | -0.16024 |
| 142A ->143A | 0.30283  |
| 142A ->144A | -0.21726 |
| 134B ->146B | -0.14160 |
| 135B ->142B | -0.12698 |
| 135B ->146B | 0.12213  |
| 137B ->141B | -0.12635 |
| 137B ->147B | -0.14075 |
| 138B ->142B | 0.21008  |
| 138B ->148B | 0.11566  |
| 140B ->142B | -0.13679 |

Excited State 20: 3.776-A 3.5889 eV 345.47 nm f=0.0239 <S\*\*2>=3.315

|             |          |
|-------------|----------|
| 134A ->145A | 0.13828  |
| 135A ->145A | 0.16727  |
| 138A ->146A | 0.10131  |
| 138A ->148A | 0.12437  |
| 139A ->144A | -0.12246 |
| 139A ->146A | -0.17173 |
| 139A ->148A | -0.13263 |
| 140A ->143A | 0.37603  |
| 140A ->144A | 0.22747  |
| 140A ->145A | 0.10439  |
| 140A ->146A | 0.11501  |
| 140A ->148A | 0.12678  |
| 141A ->143A | 0.27298  |
| 141A ->144A | 0.22640  |
| 131B ->141B | -0.11465 |
| 133B ->145B | 0.20535  |
| 136B ->141B | -0.12602 |
| 136B ->147B | -0.11265 |
| 137B ->141B | 0.12053  |
| 137B ->144B | 0.11489  |
| 137B ->147B | 0.14102  |
| 137B ->148B | -0.13105 |
| 138B ->141B | 0.16017  |
| 138B ->147B | 0.10381  |
| 139B ->143B | 0.21670  |
| 140B ->143B | -0.14840 |
| 140B ->144B | -0.14123 |

Excited State 21: 3.581-A 3.6071 eV 343.72 nm f=0.0065 <S\*\*2>=2.956

|             |          |
|-------------|----------|
| 135A ->145A | -0.12221 |
| 138A ->148A | -0.13473 |

|             |          |
|-------------|----------|
| 139A ->146A | 0.17809  |
| 140A ->143A | 0.50886  |
| 140A ->144A | 0.25513  |
| 140A ->148A | -0.15259 |
| 141A ->143A | 0.18370  |
| 141A ->144A | 0.24800  |
| 142A ->144A | -0.22696 |
| 132B ->141B | 0.10197  |
| 133B ->145B | -0.13744 |
| 136B ->141B | 0.12604  |
| 137B ->144B | -0.10544 |
| 137B ->148B | 0.14422  |
| 138B ->141B | -0.14139 |
| 138B ->147B | -0.12264 |
| 139B ->144B | 0.16342  |
| 140B ->143B | -0.18030 |
| 140B ->144B | 0.13055  |

Excited State 22: 3.823-A 3.6282 eV 341.73 nm f=0.0099 <S\*\*2>=3.403

|             |          |
|-------------|----------|
| 136A ->146A | -0.10274 |
| 138A ->146A | -0.11417 |
| 139A ->148A | 0.16576  |
| 140A ->143A | -0.21090 |
| 140A ->144A | 0.50507  |
| 140A ->146A | -0.12695 |
| 141A ->144A | 0.22413  |
| 142A ->143A | -0.21306 |
| 142A ->144A | 0.13517  |
| 131B ->141B | 0.10377  |
| 133B ->145B | -0.11743 |
| 134B ->146B | -0.11828 |
| 135B ->146B | 0.10308  |

|             |          |
|-------------|----------|
| 136B ->142B | -0.10841 |
| 136B ->144B | 0.11183  |
| 137B ->141B | -0.10810 |
| 137B ->147B | -0.14586 |
| 138B ->142B | 0.19553  |
| 138B ->148B | 0.10492  |
| 139B ->143B | 0.32673  |
| 140B ->144B | -0.15021 |

Excited State 23: 3.621-A 3.7318 eV 332.23 nm f=0.0123 <S\*\*2>=3.028

|             |          |
|-------------|----------|
| 139A ->144A | 0.10260  |
| 141A ->143A | -0.13962 |
| 135B ->141B | -0.10229 |
| 136B ->144B | -0.10156 |
| 137B ->142B | -0.13692 |
| 138B ->142B | -0.51645 |
| 138B ->144B | -0.17772 |
| 139B ->142B | 0.17454  |
| 139B ->144B | 0.53391  |
| 140B ->144B | 0.17603  |

Excited State 24: 3.218-A 3.7705 eV 328.82 nm f=0.0064 <S\*\*2>=2.339

|             |          |
|-------------|----------|
| 140A ->144A | 0.18026  |
| 141A ->144A | 0.11448  |
| 129B ->141B | -0.12109 |
| 134B ->142B | -0.11706 |
| 135B ->142B | -0.21073 |
| 135B ->144B | 0.10692  |
| 136B ->142B | 0.18660  |
| 137B ->142B | -0.13107 |
| 138B ->141B | -0.21536 |
| 138B ->142B | 0.16318  |

|             |          |
|-------------|----------|
| 138B ->143B | 0.14838  |
| 139B ->144B | -0.14516 |
| 140B ->144B | 0.72588  |

Excited State 25: 3.593-A 3.8251 eV 324.14 nm f=0.0143 <S\*\*2>=2.978

|             |          |
|-------------|----------|
| 139A ->143A | 0.13880  |
| 139A ->144A | 0.10613  |
| 140A ->144A | 0.13102  |
| 142A ->150A | 0.10611  |
| 131B ->142B | 0.18768  |
| 132B ->143B | 0.12560  |
| 136B ->141B | 0.11677  |
| 138B ->141B | -0.36270 |
| 138B ->142B | 0.22550  |
| 138B ->143B | 0.46380  |
| 138B ->144B | 0.11468  |
| 139B ->142B | 0.14218  |
| 139B ->143B | 0.15453  |
| 139B ->144B | 0.40608  |
| 139B ->150B | -0.10393 |
| 140B ->144B | -0.26006 |
| 140B ->149B | 0.11211  |

Excited State 26: 3.503-A 3.8473 eV 322.27 nm f=0.0258 <S\*\*2>=2.818

|             |          |
|-------------|----------|
| 139A ->143A | -0.12877 |
| 140A ->143A | -0.14284 |
| 131B ->141B | -0.11386 |
| 132B ->143B | -0.10146 |
| 134B ->141B | -0.10588 |
| 137B ->141B | 0.15188  |
| 138B ->141B | 0.26172  |
| 138B ->142B | 0.41940  |

138B ->143B -0.30354  
138B ->144B 0.27097  
139B ->142B 0.13765  
139B ->143B -0.13908  
139B ->144B 0.48799  
140B ->143B -0.12681  
140B ->144B 0.12598

Excited State 27: 3.267-A 3.8784 eV 319.68 nm f=0.0103 <S\*\*2>=2.418

129B ->141B 0.26762  
131B ->144B 0.12988  
132B ->141B -0.20896  
135B ->141B -0.24426  
136B ->141B -0.34301  
137B ->144B -0.10715  
138B ->141B 0.34287  
138B ->143B 0.58402  
140B ->144B 0.13192

Excited State 28: 3.188-A 3.9427 eV 314.46 nm f=0.0286 <S\*\*2>=2.291

128B ->141B 0.16985  
130B ->141B -0.18141  
131B ->141B -0.50152  
131B ->143B -0.13018  
132B ->141B 0.12442  
134B ->141B -0.21892  
137B ->141B 0.60031  
137B ->143B 0.10641  
138B ->144B -0.15607

Excited State 29: 3.362-A 3.9728 eV 312.09 nm f=0.0073 <S\*\*2>=2.576

139A ->143A 0.78540

|             |          |
|-------------|----------|
| 139A ->144A | -0.33022 |
| 140A ->143A | -0.12099 |
| 140A ->144A | 0.17966  |
| 138B ->141B | 0.13614  |
| 138B ->142B | -0.11359 |
| 138B ->143B | -0.11336 |
| 140B ->144B | 0.13408  |

Excited State 30: 3.343-A 3.9836 eV 311.23 nm f=0.0206 <S\*\*2>=2.544

|             |          |
|-------------|----------|
| 139A ->143A | 0.36443  |
| 139A ->144A | 0.81133  |
| 140A ->143A | 0.18257  |
| 140A ->144A | 0.13576  |
| 138B ->143B | -0.12501 |
| 139B ->144B | -0.12694 |

Excited State 31: 4.025-A 4.0680 eV 304.78 nm f=0.0009 <S\*\*2>=3.800

|             |          |
|-------------|----------|
| 137A ->143A | -0.10999 |
| 137A ->144A | -0.13523 |
| 140A ->149A | 0.19219  |
| 140A ->150A | 0.12945  |
| 141A ->149A | 0.17301  |
| 142A ->149A | 0.35140  |
| 142A ->150A | 0.31957  |
| 132B ->143B | -0.11126 |
| 136B ->142B | -0.18848 |
| 136B ->143B | 0.28259  |
| 138B ->143B | -0.20446 |
| 139B ->149B | -0.25239 |
| 139B ->150B | -0.24289 |
| 140B ->149B | 0.32820  |
| 140B ->150B | 0.20835  |



Excited State 32: 3.971-A 4.0794 eV 303.93 nm f=0.0065 <S\*\*2>=3.692

|             |          |
|-------------|----------|
| 138A ->143A | -0.11245 |
| 139A ->143A | 0.14023  |
| 139A ->144A | -0.17376 |
| 140A ->149A | -0.10372 |
| 140A ->150A | 0.16559  |
| 141A ->149A | -0.24245 |
| 141A ->150A | 0.32502  |
| 142A ->149A | 0.23126  |
| 142A ->150A | -0.19217 |
| 135B ->142B | -0.10874 |
| 136B ->143B | 0.12035  |
| 137B ->142B | 0.34197  |
| 137B ->143B | 0.15482  |
| 137B ->144B | 0.11918  |
| 138B ->142B | 0.10937  |
| 139B ->149B | -0.23938 |
| 139B ->150B | 0.22232  |
| 140B ->149B | -0.19685 |
| 140B ->150B | 0.29425  |

Excited State 33: 3.676-A 4.1756 eV 296.93 nm f=0.0100 <S\*\*2>=3.128

|             |          |
|-------------|----------|
| 134A ->144A | 0.10221  |
| 135A ->143A | 0.10604  |
| 129B ->141B | -0.11041 |
| 131B ->144B | 0.10577  |
| 134B ->144B | 0.13923  |
| 135B ->142B | 0.20870  |
| 135B ->143B | 0.15968  |
| 135B ->144B | 0.12741  |
| 136B ->142B | -0.20357 |

137B ->142B 0.67865  
137B ->143B -0.16022  
137B ->144B 0.18515

Excited State 34: 3.688-A 4.1902 eV 295.89 nm f=0.0060 <S\*\*2>=3.150

128B ->141B 0.12891  
131B ->141B -0.11872  
132B ->142B 0.14941  
132B ->143B -0.15036  
134B ->143B 0.16901  
135B ->142B 0.31525  
135B ->143B 0.11427  
136B ->141B 0.15099  
136B ->142B 0.19543  
136B ->143B -0.26714  
137B ->141B -0.21387  
137B ->143B 0.62423  
138B ->144B 0.11162

Excited State 35: 3.507-A 4.2399 eV 292.42 nm f=0.0420 <S\*\*2>=2.825

129B ->142B -0.21648  
132B ->142B 0.14007  
133B ->141B 0.15261  
134B ->143B -0.10092  
135B ->142B 0.34392  
136B ->141B -0.11031  
136B ->142B 0.52372  
136B ->143B 0.21734  
137B ->141B 0.12270  
137B ->143B -0.24005  
138B ->144B 0.35733

Excited State 36: 3.462-A 4.2790 eV 289.75 nm f=0.0071 <S\*\*2>=2.746

|             |          |
|-------------|----------|
| 134A ->147A | 0.10586  |
| 139A ->146A | -0.11346 |
| 139A ->147A | 0.11779  |
| 140A ->146A | -0.10938 |
| 140A ->147A | 0.18679  |
| 141A ->147A | -0.11077 |
| 129B ->141B | -0.27833 |
| 131B ->141B | -0.12690 |
| 132B ->141B | 0.14429  |
| 132B ->142B | 0.11184  |
| 133B ->141B | 0.11974  |
| 134B ->141B | 0.40601  |
| 134B ->142B | 0.36216  |
| 134B ->147B | 0.10121  |
| 135B ->141B | -0.37249 |
| 136B ->141B | -0.15282 |
| 137B ->144B | 0.11777  |

Excited State 37: 3.434-A 4.2984 eV 288.45 nm f=0.0137 <S\*\*2>=2.697

|             |          |
|-------------|----------|
| 139A ->147A | -0.10303 |
| 139A ->148A | -0.10340 |
| 140A ->145A | -0.16710 |
| 140A ->146A | 0.11843  |
| 141A ->145A | 0.16512  |
| 129B ->141B | -0.23754 |
| 131B ->142B | 0.22614  |
| 132B ->142B | -0.15073 |
| 133B ->141B | 0.59331  |
| 134B ->144B | 0.11819  |
| 135B ->142B | 0.14467  |
| 136B ->141B | -0.19366 |

136B ->142B -0.19194  
136B ->144B -0.11076  
137B ->143B 0.16604  
137B ->144B 0.10933

Excited State 38: 3.455-A 4.3191 eV 287.06 nm f=0.0106 <S\*\*2>=2.734

138A ->144A -0.14084  
139A ->145A 0.17284  
140A ->145A -0.18004  
141A ->145A 0.17347  
129B ->141B 0.28281  
130B ->141B -0.11918  
130B ->143B -0.14340  
131B ->141B 0.28178  
131B ->142B -0.18651  
131B ->143B 0.13969  
132B ->141B 0.34214  
133B ->141B 0.10952  
133B ->142B -0.14114  
133B ->144B 0.11508  
134B ->143B 0.12331  
135B ->141B -0.22359  
135B ->142B -0.12943  
136B ->141B 0.15344  
136B ->142B -0.10285  
137B ->141B 0.15226  
137B ->142B 0.13745  
137B ->143B -0.16212  
137B ->145B 0.11970

Excited State 39: 3.094-A 4.3370 eV 285.87 nm f=0.0138 <S\*\*2>=2.143

129B ->141B -0.12622

|             |          |
|-------------|----------|
| 130B ->141B | 0.21672  |
| 130B ->143B | 0.10838  |
| 131B ->141B | 0.20899  |
| 132B ->141B | 0.56987  |
| 132B ->143B | 0.12238  |
| 133B ->141B | -0.28776 |
| 134B ->141B | -0.33209 |
| 134B ->143B | -0.10697 |
| 136B ->141B | -0.42689 |
| 137B ->143B | 0.10450  |
| 138B ->141B | -0.12421 |

Excited State 40: 3.421-A 4.3635 eV 284.14 nm f=0.0791 <S\*\*2>=2.675

|             |          |
|-------------|----------|
| 135A ->143A | -0.11307 |
| 138A ->143A | -0.20175 |
| 138A ->144A | 0.23900  |
| 130B ->141B | -0.26009 |
| 130B ->143B | -0.16745 |
| 130B ->144B | -0.13292 |
| 131B ->141B | 0.20816  |
| 131B ->142B | 0.28885  |
| 133B ->141B | -0.20546 |
| 135B ->141B | -0.29050 |
| 135B ->142B | 0.32186  |
| 136B ->141B | 0.24363  |
| 136B ->142B | -0.15593 |
| 136B ->143B | -0.11259 |
| 136B ->144B | -0.20590 |
| 137B ->141B | 0.13472  |
| 137B ->142B | -0.16996 |
| 137B ->143B | -0.17172 |
| 138B ->144B | 0.11152  |

Excited State 41: 3.637-A 4.3782 eV 283.19 nm f=0.0058 <S\*\*2>=3.057

|             |          |
|-------------|----------|
| 137A ->144A | -0.11281 |
| 138A ->145A | 0.11574  |
| 139A ->145A | -0.18471 |
| 140A ->145A | 0.14873  |
| 141A ->145A | -0.18761 |
| 129B ->141B | -0.21261 |
| 129B ->143B | -0.14890 |
| 130B ->143B | -0.15005 |
| 131B ->143B | 0.17785  |
| 131B ->144B | -0.11612 |
| 133B ->141B | 0.20143  |
| 133B ->142B | 0.13190  |
| 133B ->145B | -0.10236 |
| 134B ->142B | -0.19779 |
| 134B ->143B | 0.21854  |
| 135B ->141B | -0.24120 |
| 135B ->142B | -0.17074 |
| 135B ->143B | 0.34276  |
| 135B ->144B | -0.13694 |
| 136B ->142B | 0.11775  |
| 136B ->143B | -0.23654 |
| 136B ->145B | 0.10306  |
| 137B ->145B | -0.12741 |
| 138B ->145B | -0.10180 |

Excited State 42: 3.421-A 4.3943 eV 282.15 nm f=0.0267 <S\*\*2>=2.675

|             |          |
|-------------|----------|
| 133A ->144A | 0.13781  |
| 134A ->143A | -0.11540 |
| 138A ->143A | -0.27798 |
| 142A ->149A | 0.10906  |

|             |          |
|-------------|----------|
| 130B ->141B | 0.40038  |
| 130B ->143B | -0.13614 |
| 131B ->141B | -0.31330 |
| 132B ->142B | 0.11967  |
| 133B ->141B | -0.12149 |
| 133B ->142B | -0.12989 |
| 135B ->141B | 0.21760  |
| 136B ->141B | -0.13027 |
| 136B ->143B | -0.28955 |
| 137B ->141B | -0.13725 |
| 137B ->143B | -0.36313 |
| 138B ->143B | 0.10128  |

Excited State 43: 3.372-A 4.3999 eV 281.79 nm f=0.0035 <S\*\*2>=2.593

|             |          |
|-------------|----------|
| 138A ->144A | 0.23713  |
| 139A ->147A | 0.11303  |
| 140A ->145A | 0.17168  |
| 141A ->145A | -0.18012 |
| 128B ->141B | -0.11904 |
| 129B ->141B | 0.42877  |
| 129B ->143B | 0.10033  |
| 130B ->141B | 0.13330  |
| 132B ->141B | 0.20211  |
| 132B ->142B | 0.11413  |
| 133B ->141B | 0.37824  |
| 134B ->142B | 0.11495  |
| 135B ->141B | 0.32701  |
| 135B ->146B | 0.12543  |
| 136B ->142B | -0.13341 |
| 136B ->143B | -0.10318 |
| 137B ->145B | -0.13707 |
| 138B ->146B | -0.11771 |

Excited State 44: 3.493-A 4.4206 eV 280.47 nm f=0.0105 <S\*\*2>=2.800

|             |          |
|-------------|----------|
| 136A ->143A | -0.17332 |
| 136A ->147A | 0.11702  |
| 137A ->144A | 0.17063  |
| 138A ->143A | -0.18364 |
| 140A ->148A | -0.11330 |
| 129B ->141B | 0.12341  |
| 131B ->141B | -0.18764 |
| 132B ->141B | 0.20463  |
| 132B ->142B | -0.16632 |
| 132B ->143B | 0.10480  |
| 133B ->142B | 0.14139  |
| 134B ->141B | 0.50695  |
| 134B ->142B | -0.38064 |
| 134B ->146B | -0.10338 |
| 135B ->141B | -0.18673 |
| 135B ->142B | 0.14008  |
| 136B ->143B | 0.16537  |
| 137B ->144B | -0.11683 |

Excited State 45: 3.440-A 4.4385 eV 279.34 nm f=0.0059 <S\*\*2>=2.708

|             |          |
|-------------|----------|
| 133A ->143A | 0.12468  |
| 133A ->144A | -0.18113 |
| 134A ->143A | 0.27901  |
| 134A ->144A | -0.12486 |
| 136A ->143A | 0.22316  |
| 136A ->144A | -0.12514 |
| 137A ->144A | -0.15327 |
| 138A ->143A | 0.47495  |
| 138A ->144A | -0.17156 |
| 129B ->141B | 0.12334  |



|             |          |
|-------------|----------|
| 130B ->141B | 0.11338  |
| 130B ->142B | -0.11961 |
| 131B ->141B | -0.16519 |
| 131B ->142B | 0.13458  |
| 132B ->141B | 0.20577  |
| 133B ->142B | -0.10467 |
| 134B ->141B | 0.30564  |
| 135B ->143B | -0.10532 |
| 136B ->142B | -0.14951 |
| 136B ->143B | -0.17641 |
| 136B ->144B | -0.11847 |

Excited State 46: 3.514-A 4.4743 eV 277.11 nm f=0.0061 <S\*\*2>=2.837

|             |          |
|-------------|----------|
| 133A ->143A | -0.21117 |
| 133A ->144A | -0.15372 |
| 134A ->143A | 0.11905  |
| 134A ->144A | 0.24879  |
| 135A ->144A | -0.11873 |
| 136A ->144A | 0.16137  |
| 137A ->143A | -0.23784 |
| 137A ->144A | -0.16194 |
| 138A ->143A | 0.34447  |
| 138A ->144A | 0.56357  |
| 139A ->145A | 0.10013  |
| 140A ->145A | -0.11966 |
| 141A ->145A | 0.15267  |
| 131B ->142B | -0.10028 |
| 133B ->141B | -0.16349 |
| 134B ->142B | -0.13455 |

Excited State 47: 3.518-A 4.4776 eV 276.90 nm f=0.0029 <S\*\*2>=2.844

|             |          |
|-------------|----------|
| 136A ->144A | -0.11917 |
|-------------|----------|

|             |          |
|-------------|----------|
| 137A ->143A | 0.10898  |
| 128B ->141B | 0.17751  |
| 129B ->141B | 0.25383  |
| 130B ->143B | 0.11613  |
| 131B ->141B | -0.16344 |
| 131B ->142B | 0.10951  |
| 131B ->143B | 0.21527  |
| 132B ->143B | 0.20732  |
| 133B ->143B | -0.18065 |
| 133B ->145B | -0.10879 |
| 134B ->142B | 0.13354  |
| 134B ->143B | 0.16849  |
| 135B ->143B | 0.42217  |
| 136B ->143B | 0.39177  |
| 136B ->144B | -0.14572 |
| 137B ->141B | -0.15451 |
| 137B ->143B | -0.12310 |
| 137B ->144B | 0.14922  |
| 138B ->143B | -0.12398 |

Excited State 48: 3.642-A 4.4985 eV 275.61 nm f=0.0140 <S\*\*2>=3.066

|             |          |
|-------------|----------|
| 134A ->143A | -0.17249 |
| 138A ->143A | -0.20587 |
| 138A ->144A | 0.14063  |
| 139A ->147A | -0.15884 |
| 140A ->146A | 0.14880  |
| 140A ->147A | -0.21326 |
| 141A ->146A | -0.17124 |
| 141A ->147A | 0.20107  |
| 142A ->146A | -0.10352 |
| 142A ->147A | 0.16010  |
| 129B ->141B | 0.15495  |

|             |          |
|-------------|----------|
| 130B ->142B | 0.11543  |
| 130B ->144B | 0.10694  |
| 131B ->143B | -0.12668 |
| 132B ->141B | 0.16057  |
| 132B ->143B | -0.14804 |
| 133B ->142B | 0.11626  |
| 134B ->141B | 0.18699  |
| 134B ->142B | 0.26643  |
| 135B ->142B | -0.16700 |
| 135B ->143B | -0.20443 |
| 135B ->146B | -0.11911 |
| 136B ->143B | -0.10508 |
| 137B ->146B | -0.14175 |
| 138B ->146B | 0.12378  |
| 140B ->146B | 0.11105  |

Excited State 49: 3.699-A 4.5284 eV 273.79 nm f=0.0068 <S\*\*2>=3.172

|             |          |
|-------------|----------|
| 134A ->144A | -0.19071 |
| 134A ->145A | -0.10123 |
| 135A ->145A | -0.15096 |
| 138A ->144A | -0.14505 |
| 138A ->145A | 0.10915  |
| 139A ->146A | -0.10449 |
| 139A ->148A | -0.11073 |
| 140A ->146A | 0.16450  |
| 140A ->147A | 0.19229  |
| 140A ->148A | 0.11122  |
| 141A ->146A | -0.23997 |
| 141A ->147A | -0.22479 |
| 141A ->148A | -0.15847 |
| 142A ->147A | -0.14383 |
| 131B ->143B | -0.10344 |

|             |          |
|-------------|----------|
| 133B ->141B | -0.17544 |
| 133B ->142B | 0.30885  |
| 133B ->143B | -0.15793 |
| 133B ->145B | -0.23779 |
| 134B ->142B | -0.13755 |
| 134B ->143B | -0.11421 |
| 134B ->146B | -0.11267 |
| 135B ->142B | -0.14141 |
| 135B ->143B | -0.12213 |
| 135B ->146B | 0.13551  |
| 136B ->142B | -0.15691 |
| 137B ->147B | 0.13575  |
| 140B ->147B | -0.12934 |

Excited State 50: 3.520-A 4.5670 eV 271.48 nm f=0.0100 <S\*\*2>=2.847

|             |          |
|-------------|----------|
| 134A ->143A | 0.13153  |
| 136A ->143A | -0.14889 |
| 136A ->144A | 0.12955  |
| 136A ->146A | -0.11571 |
| 136A ->147A | 0.15117  |
| 137A ->143A | -0.10245 |
| 137A ->144A | 0.16141  |
| 139A ->146A | 0.11827  |
| 140A ->148A | -0.18599 |
| 141A ->148A | 0.22496  |
| 142A ->148A | 0.10542  |
| 129B ->142B | -0.10189 |
| 129B ->144B | 0.12830  |
| 131B ->143B | 0.15900  |
| 132B ->142B | 0.13343  |
| 132B ->144B | -0.12133 |
| 132B ->146B | -0.11672 |

|             |          |
|-------------|----------|
| 134B ->142B | 0.30472  |
| 134B ->143B | 0.15639  |
| 134B ->145B | 0.10052  |
| 134B ->146B | -0.20807 |
| 135B ->142B | -0.29479 |
| 135B ->144B | -0.10173 |
| 136B ->144B | -0.10239 |
| 137B ->144B | -0.11944 |
| 138B ->144B | 0.20647  |
| 140B ->145B | -0.11283 |
| 140B ->146B | 0.17459  |

Excited State 51: 3.403-A 4.5808 eV 270.66 nm f=0.0266 <S\*\*2>=2.645

|             |          |
|-------------|----------|
| 134A ->143A | 0.11042  |
| 135A ->144A | 0.16295  |
| 135A ->145A | 0.10029  |
| 136A ->143A | 0.17235  |
| 141A ->145A | 0.14643  |
| 142A ->145A | 0.10888  |
| 128B ->141B | -0.16320 |
| 130B ->143B | -0.14964 |
| 131B ->143B | -0.14933 |
| 132B ->142B | 0.19707  |
| 133B ->142B | 0.60759  |
| 133B ->143B | -0.14069 |
| 133B ->144B | -0.12711 |
| 133B ->145B | 0.12264  |
| 134B ->142B | 0.17943  |
| 135B ->143B | 0.27582  |
| 136B ->144B | 0.10124  |
| 137B ->145B | 0.11714  |

Excited State 52: 3.350-A 4.5944 eV 269.86 nm f=0.0077 <S\*\*2>=2.556

|             |          |
|-------------|----------|
| 140A ->146A | -0.13696 |
| 141A ->146A | 0.25409  |
| 142A ->146A | 0.11613  |
| 128B ->141B | 0.29949  |
| 129B ->142B | -0.10503 |
| 129B ->144B | 0.13467  |
| 130B ->143B | 0.14932  |
| 132B ->141B | 0.12671  |
| 132B ->143B | -0.13771 |
| 133B ->141B | 0.23107  |
| 133B ->142B | 0.34760  |
| 133B ->143B | -0.10479 |
| 134B ->141B | -0.11089 |
| 134B ->142B | -0.25653 |
| 134B ->146B | 0.11515  |
| 135B ->141B | -0.10947 |
| 135B ->143B | -0.22652 |
| 135B ->144B | -0.12227 |
| 136B ->142B | -0.16163 |
| 137B ->141B | -0.11567 |
| 138B ->144B | 0.22019  |
| 140B ->146B | -0.10797 |

Excited State 53: 3.518-A 4.6244 eV 268.11 nm f=0.0338 <S\*\*2>=2.845

|             |          |
|-------------|----------|
| 136A ->143A | -0.35164 |
| 136A ->144A | 0.19031  |
| 137A ->143A | -0.24140 |
| 137A ->144A | 0.25655  |
| 128B ->141B | 0.12436  |
| 130B ->142B | -0.10104 |
| 130B ->143B | -0.20530 |

|             |          |
|-------------|----------|
| 131B ->143B | -0.29969 |
| 132B ->142B | 0.43247  |
| 132B ->143B | 0.11533  |
| 133B ->142B | -0.18847 |
| 134B ->143B | -0.21704 |
| 135B ->142B | -0.12265 |
| 135B ->143B | 0.14338  |
| 135B ->144B | 0.15300  |

Excited State 54: 3.472-A 4.6372 eV 267.37 nm f=0.0277 <S\*\*2>=2.763

|             |          |
|-------------|----------|
| 136A ->143A | -0.12785 |
| 141A ->145A | 0.26622  |
| 141A ->146A | 0.22633  |
| 141A ->147A | 0.10007  |
| 141A ->148A | -0.10158 |
| 142A ->145A | 0.40091  |
| 142A ->146A | 0.22951  |
| 128B ->141B | -0.36466 |
| 129B ->142B | -0.13359 |
| 130B ->142B | -0.15587 |
| 133B ->141B | -0.21155 |
| 133B ->142B | -0.10669 |
| 134B ->141B | 0.15678  |
| 134B ->142B | -0.15732 |
| 135B ->143B | 0.12979  |
| 136B ->143B | -0.10811 |
| 136B ->144B | -0.10692 |
| 137B ->141B | 0.12838  |
| 137B ->143B | 0.15175  |
| 138B ->144B | 0.10255  |
| 140B ->145B | 0.16850  |

Excited State 55: 3.533-A 4.6458 eV 266.88 nm f=0.0139  $\langle S^{*2} \rangle = 2.870$

|             |          |
|-------------|----------|
| 134A ->143A | -0.22513 |
| 134A ->144A | 0.14688  |
| 135A ->144A | -0.13185 |
| 136A ->143A | 0.17865  |
| 136A ->144A | -0.19022 |
| 137A ->143A | 0.41243  |
| 137A ->144A | -0.13882 |
| 138A ->144A | 0.14392  |
| 141A ->145A | 0.10683  |
| 141A ->147A | 0.13190  |
| 142A ->145A | -0.17812 |
| 129B ->141B | -0.11781 |
| 129B ->142B | -0.16729 |
| 131B ->142B | -0.27453 |
| 131B ->143B | -0.15514 |
| 132B ->142B | 0.28172  |
| 133B ->142B | -0.13697 |
| 134B ->142B | -0.17058 |
| 136B ->142B | -0.25529 |
| 137B ->143B | 0.10658  |
| 138B ->144B | 0.15144  |

Excited State 56: 3.577-A 4.6489 eV 266.70 nm f=0.0658  $\langle S^{*2} \rangle = 2.949$

|             |          |
|-------------|----------|
| 134A ->144A | 0.11620  |
| 135A ->143A | 0.13652  |
| 137A ->143A | 0.22708  |
| 137A ->144A | 0.15480  |
| 138A ->143A | 0.11661  |
| 141A ->146A | -0.15327 |
| 141A ->147A | -0.10064 |
| 141A ->148A | 0.11195  |



|             |          |
|-------------|----------|
| 142A ->145A | 0.61855  |
| 142A ->146A | 0.10312  |
| 129B ->142B | 0.13802  |
| 130B ->142B | 0.15979  |
| 131B ->142B | 0.14744  |
| 132B ->142B | 0.26249  |
| 132B ->143B | -0.12079 |
| 136B ->143B | 0.12888  |
| 136B ->144B | 0.12253  |
| 140B ->145B | 0.17651  |

Excited State 57: 3.550-A 4.6651 eV 265.77 nm f=0.0123 <S\*\*2>=2.901

|             |          |
|-------------|----------|
| 130A ->144A | 0.15694  |
| 133A ->143A | 0.17322  |
| 134A ->144A | -0.11686 |
| 137A ->144A | 0.18189  |
| 138A ->143A | 0.12060  |
| 138A ->144A | 0.12022  |
| 141A ->146A | 0.21299  |
| 129B ->142B | -0.24147 |
| 129B ->143B | 0.11963  |
| 129B ->144B | 0.13032  |
| 130B ->142B | 0.36265  |
| 130B ->143B | -0.22241 |
| 130B ->144B | 0.12002  |
| 131B ->142B | 0.13575  |
| 131B ->143B | -0.10418 |
| 131B ->144B | 0.12264  |
| 132B ->142B | -0.28541 |
| 135B ->143B | 0.23007  |
| 135B ->144B | -0.19198 |
| 137B ->143B | 0.15284  |

137B ->144B 0.14411

138B ->144B 0.14247

Excited State 58: 3.451-A 4.6791 eV 264.97 nm f=0.1507 <S\*\*2>=2.728

134A ->144A -0.15335

135A ->143A -0.19030

137A ->143A -0.12750

137A ->144A -0.21297

138A ->143A -0.14316

141A ->145A -0.12130

141A ->147A -0.16460

141A ->148A 0.20968

142A ->145A 0.36972

142A ->146A 0.12720

128B ->141B 0.28060

129B ->142B -0.10202

130B ->143B -0.14874

131B ->142B -0.29691

131B ->143B -0.19076

132B ->142B -0.24114

132B ->143B 0.11488

133B ->141B 0.10692

134B ->141B -0.11587

134B ->142B 0.14737

134B ->143B -0.18084

137B ->141B -0.17872

Excited State 59: 3.529-A 4.6864 eV 264.56 nm f=0.0362 <S\*\*2>=2.864

133A ->144A -0.10808

134A ->143A 0.18461

134A ->144A 0.30261

135A ->143A 0.32446

|             |          |
|-------------|----------|
| 135A ->144A | 0.26746  |
| 136A ->144A | 0.14005  |
| 137A ->143A | 0.13873  |
| 138A ->143A | -0.11016 |
| 138A ->144A | -0.11878 |
| 141A ->145A | 0.25070  |
| 141A ->146A | -0.19612 |
| 141A ->148A | -0.17006 |
| 142A ->146A | -0.14581 |
| 142A ->147A | -0.17717 |
| 128B ->141B | 0.15984  |
| 130B ->142B | -0.24289 |
| 132B ->142B | -0.21525 |
| 134B ->143B | -0.11474 |
| 136B ->142B | 0.10307  |
| 140B ->145B | 0.25981  |
| 140B ->147B | -0.10305 |

Excited State 60: 3.636-A 4.6982 eV 263.90 nm f=0.0098 <S\*\*2>=3.055

|             |          |
|-------------|----------|
| 133A ->143A | 0.10765  |
| 134A ->144A | -0.22612 |
| 135A ->143A | -0.23926 |
| 137A ->143A | -0.12918 |
| 141A ->145A | 0.32726  |
| 141A ->146A | 0.24724  |
| 141A ->147A | 0.36580  |
| 142A ->146A | -0.23626 |
| 142A ->147A | -0.28615 |
| 142A ->148A | 0.17177  |
| 128B ->141B | 0.10522  |
| 129B ->142B | 0.15094  |
| 129B ->144B | -0.10193 |

134B ->142B 0.10883  
135B ->143B -0.11551  
138B ->144B -0.12406  
140B ->145B 0.31263  
140B ->146B 0.10191  
140B ->147B -0.14515

Excited State 61: 3.495-A 4.7032 eV 263.62 nm f=0.0517 <S\*\*2>=2.804

134A ->143A -0.29766  
135A ->144A -0.24067  
137A ->144A -0.27789  
141A ->145A -0.16771  
141A ->146A 0.12998  
141A ->147A 0.20234  
142A ->146A 0.18160  
142A ->147A -0.13815  
142A ->148A 0.14069  
130B ->142B -0.20000  
130B ->144B 0.14017  
131B ->142B 0.39423  
131B ->143B -0.14842  
134B ->143B -0.16460  
135B ->142B -0.21287  
135B ->143B 0.14007  
136B ->142B 0.17103  
137B ->144B -0.15413  
140B ->145B -0.14380  
140B ->147B -0.11755

Excited State 62: 3.509-A 4.7161 eV 262.90 nm f=0.0013 <S\*\*2>=2.829

141A ->145A 0.29341  
141A ->146A -0.28935

|             |          |
|-------------|----------|
| 141A ->148A | 0.20824  |
| 142A ->145A | -0.35396 |
| 142A ->146A | 0.74897  |
| 142A ->148A | 0.15730  |
| 140B ->145B | 0.10625  |

Excited State 63: 3.660-A 4.7243 eV 262.44 nm f=0.0052 <S\*\*2>=3.098

|             |          |
|-------------|----------|
| 133A ->144A | 0.12404  |
| 134A ->143A | -0.23433 |
| 135A ->144A | -0.16621 |
| 141A ->145A | 0.16107  |
| 141A ->146A | -0.19640 |
| 141A ->147A | -0.25004 |
| 141A ->148A | 0.24361  |
| 142A ->145A | -0.14042 |
| 142A ->146A | -0.22020 |
| 142A ->147A | 0.21702  |
| 142A ->148A | -0.27155 |
| 131B ->142B | 0.15937  |
| 135B ->143B | 0.10492  |
| 140B ->145B | 0.54084  |

Excited State 64: 3.617-A 4.7448 eV 261.30 nm f=0.0093 <S\*\*2>=3.021

|             |          |
|-------------|----------|
| 135A ->143A | 0.12700  |
| 137A ->143A | 0.16695  |
| 141A ->145A | 0.19661  |
| 141A ->146A | 0.51158  |
| 141A ->147A | -0.47147 |
| 142A ->145A | -0.16852 |
| 142A ->147A | 0.16105  |
| 129B ->142B | 0.13497  |
| 132B ->143B | -0.12437 |

133B ->143B -0.17590  
140B ->146B 0.33104

Excited State 65: 3.474-A 4.7506 eV 260.99 nm f=0.0026 <S\*\*2>=2.767

130A ->143A 0.12389  
133A ->143A 0.17304  
133A ->144A 0.21877  
134A ->143A -0.19131  
134A ->144A -0.10721  
136A ->144A 0.19021  
137A ->143A 0.25903  
138A ->143A 0.15951  
138A ->144A 0.23286  
129B ->142B -0.14043  
130B ->142B -0.35801  
130B ->143B -0.14820  
131B ->143B 0.10935  
132B ->142B -0.13761  
132B ->144B 0.11377  
133B ->142B 0.14236  
133B ->143B 0.40958  
134B ->143B 0.18516  
135B ->143B -0.11792  
135B ->144B 0.11725  
137B ->142B 0.10191  
140B ->145B -0.13061

Excited State 66: 3.490-A 4.7551 eV 260.74 nm f=0.0024 <S\*\*2>=2.794

133A ->143A -0.13764  
136A ->143A 0.14940  
136A ->144A -0.23547  
137A ->143A -0.26008

|             |          |
|-------------|----------|
| 138A ->144A | -0.10968 |
| 141A ->145A | 0.22604  |
| 141A ->146A | 0.13773  |
| 141A ->147A | -0.15058 |
| 142A ->147A | 0.13031  |
| 128B ->141B | 0.11534  |
| 129B ->142B | 0.13723  |
| 131B ->142B | 0.17749  |
| 132B ->143B | 0.29232  |
| 132B ->144B | -0.12327 |
| 133B ->142B | 0.11931  |
| 133B ->143B | 0.61624  |

Excited State 67: 3.692-A 4.7621 eV 260.36 nm f=0.0024 <S\*\*2>=3.157

|             |          |
|-------------|----------|
| 133A ->143A | -0.16386 |
| 133A ->144A | 0.25573  |
| 134A ->143A | -0.17751 |
| 136A ->143A | 0.45771  |
| 137A ->143A | -0.24271 |
| 137A ->144A | 0.44638  |
| 138A ->143A | 0.14070  |
| 141A ->147A | 0.18614  |
| 142A ->147A | 0.33319  |
| 130B ->142B | -0.14156 |
| 132B ->142B | -0.12873 |
| 133B ->143B | -0.22104 |
| 140B ->147B | -0.14484 |

Excited State 68: 3.697-A 4.7707 eV 259.89 nm f=0.0091 <S\*\*2>=3.166

|             |          |
|-------------|----------|
| 133A ->143A | 0.11223  |
| 133A ->144A | -0.12401 |
| 134A ->143A | 0.11942  |

|             |          |
|-------------|----------|
| 136A ->143A | -0.18275 |
| 136A ->144A | 0.22658  |
| 137A ->143A | 0.20509  |
| 137A ->144A | -0.14453 |
| 141A ->147A | 0.17893  |
| 142A ->147A | 0.61913  |
| 142A ->148A | -0.16976 |
| 140B ->146B | -0.11938 |
| 140B ->147B | -0.43289 |

Excited State 69: 3.394-A 4.7753 eV 259.64 nm f=0.0125 <S\*\*2>=2.630

|             |          |
|-------------|----------|
| 136A ->143A | 0.13045  |
| 139A ->145A | 0.12700  |
| 140A ->145A | -0.18087 |
| 141A ->145A | -0.37872 |
| 141A ->147A | -0.11652 |
| 141A ->148A | -0.41864 |
| 142A ->146A | 0.14242  |
| 142A ->148A | 0.25076  |
| 133B ->143B | 0.12468  |
| 139B ->145B | -0.19060 |
| 139B ->146B | -0.11157 |
| 140B ->145B | 0.42857  |
| 140B ->146B | 0.35723  |

Excited State 70: 3.583-A 4.7857 eV 259.07 nm f=0.0017 <S\*\*2>=2.959

|             |          |
|-------------|----------|
| 136A ->143A | -0.10235 |
| 142A ->146A | -0.18222 |
| 142A ->147A | 0.24868  |
| 142A ->148A | 0.74091  |
| 140B ->145B | 0.11520  |
| 140B ->146B | -0.43498 |



140B ->147B 0.24756

Excited State 71: 3.410-A 4.7934 eV 258.66 nm f=0.0019 <S\*\*2>=2.657

134A ->144A -0.11063

136A ->143A 0.34445

136A ->144A 0.38811

137A ->144A 0.26854

141A ->145A -0.14837

141A ->146A 0.10157

141A ->148A 0.33396

142A ->147A -0.14431

129B ->142B 0.23142

130B ->143B 0.11777

133B ->143B 0.21561

134B ->143B -0.23356

135B ->143B 0.12345

136B ->144B -0.11316

139B ->145B -0.13197

140B ->145B 0.17020

140B ->146B -0.16541

Excited State 72: 3.597-A 4.7965 eV 258.49 nm f=0.0147 <S\*\*2>=2.985

134A ->143A -0.11324

134A ->144A -0.10220

135A ->143A -0.16950

136A ->143A 0.15063

136A ->144A 0.33084

137A ->143A 0.17197

141A ->145A 0.13850

141A ->148A -0.47128

142A ->146A 0.14866

142A ->147A 0.11989

142A ->148A -0.18298  
129B ->142B 0.13408  
134B ->143B -0.11149  
135B ->144B -0.10171  
137B ->144B -0.11196  
139B ->145B 0.15953  
140B ->147B 0.47556

SavETr: write IOETrn= 770 NScale= 10 NData= 16 NLR=1 NState= 72 LETran= 1306.

**Table S5.** Excited states, excitation energy (eV), wavelength (nm) and oscillator strength ( $f$ ) for **2a** at M06/SVP with PCM in chloroform.

Excitation energies and oscillator strengths:

Excited State 1: 2.009-A 1.5173 eV 817.15 nm  $f=0.0000$   $\langle S^{*2} \rangle = 0.759$

112B ->142B 0.12759  
116B ->142B 0.10784  
117B ->142B -0.23154  
125B ->142B 0.16781  
130B ->142B -0.27447  
131B ->142B -0.13809  
132B ->142B 0.32851  
141B ->142B 0.78037

This state for optimization and/or second-order correction.

Total Energy, E(TD-HF/TD-KS) = -3136.71488957

Copying the excited state density for this state as the 1-particle RhoCI density.

Excited State 2: 2.004-A 2.1080 eV 588.17 nm  $f=0.0000$   $\langle S^{*2} \rangle = 0.754$

107B ->142B -0.11590  
109B ->142B 0.23127  
112B ->142B 0.26191

117B ->142B 0.16676  
121B ->142B 0.29534  
124B ->142B -0.13027  
125B ->142B 0.27399  
130B ->142B 0.25484  
131B ->142B 0.40084  
132B ->142B 0.57595  
141B ->142B -0.23438

Excited State 3: 2.003-A 2.3924 eV 518.23 nm f=0.0000 <S\*\*2>=0.753

106B ->142B -0.12267  
113B ->142B 0.20583  
116B ->142B 0.12665  
122B ->142B -0.15754  
125B ->142B -0.55724  
129B ->142B 0.70109  
132B ->142B 0.12360  
135B ->142B -0.10925  
136B ->142B -0.11732

Excited State 4: 2.056-A 2.4174 eV 512.88 nm f=0.0137 <S\*\*2>=0.807

140B ->142B 0.98019

Excited State 5: 2.010-A 2.4958 eV 496.76 nm f=0.0000 <S\*\*2>=0.760

107B ->142B -0.10081  
113B ->142B -0.35916  
114B ->142B -0.17860

116B ->142B -0.16329  
117B ->142B -0.17022  
121B ->142B -0.14811  
124B ->142B -0.45883  
125B ->142B -0.28358  
130B ->142B -0.25735  
131B ->142B 0.47869  
135B ->142B 0.30352  
138B ->142B -0.14026

Excited State 6: 3.415-A 2.7245 eV 455.08 nm f=0.0010 <S\*\*2>=2.665

140A ->144A 0.42582  
141A ->143A -0.20162  
142A ->143A 0.52297  
140B ->144B -0.41487  
141B ->143B 0.53428

Excited State 7: 3.421-A 2.7268 eV 454.69 nm f=0.0000 <S\*\*2>=2.676

140A ->143A 0.42981  
141A ->144A -0.19581  
142A ->144A 0.49339  
140B ->143B -0.44164  
141B ->144B 0.52993

Excited State 8: 2.135-A 3.0375 eV 408.18 nm f=0.0000 <S\*\*2>=0.889

102B ->142B 0.15764  
116B ->142B -0.15375

|             |          |
|-------------|----------|
| 117B ->142B | 0.44480  |
| 124B ->142B | 0.12438  |
| 130B ->142B | 0.43594  |
| 131B ->142B | 0.25003  |
| 132B ->142B | -0.18656 |
| 138B ->142B | -0.19163 |
| 141B ->142B | 0.54174  |

Excited State 9: 2.477-A 3.1109 eV 398.54 nm f=0.0313 <S\*\*2>=1.284

|             |          |
|-------------|----------|
| 139A ->144A | -0.11026 |
| 139A ->148A | -0.15027 |
| 141A ->143A | -0.35620 |
| 141A ->147A | -0.11096 |
| 142A ->143A | -0.12266 |
| 136B ->146B | 0.12516  |
| 137B ->145B | -0.10031 |
| 138B ->147B | -0.14860 |
| 139B ->142B | 0.78077  |
| 139B ->148B | 0.13990  |

Excited State 10: 2.336-A 3.1828 eV 389.54 nm f=0.0011 <S\*\*2>=1.114

|             |          |
|-------------|----------|
| 133A ->144A | -0.12941 |
| 139A ->144A | 0.11881  |
| 141A ->143A | 0.61084  |
| 142A ->143A | 0.57029  |
| 139B ->142B | 0.37508  |
| 140B ->144B | 0.13355  |

141B ->143B -0.24967

Excited State 11: 2.585-A 3.1954 eV 388.01 nm f=0.0000 <S\*\*2>=1.421

133A ->143A -0.13597

139A ->143A 0.18444

141A ->144A 0.65901

142A ->144A 0.54767

139B ->143B -0.11234

139B ->147B -0.10081

141B ->144B -0.16908

Excited State 12: 3.329-A 3.3129 eV 374.24 nm f=0.0091 <S\*\*2>=2.520

135A ->144A 0.35081

136A ->143A -0.36619

137A ->144A 0.15630

138A ->143A -0.18496

140A ->144A -0.10887

140A ->149A -0.17269

141A ->143A 0.15977

142A ->150A 0.18146

133B ->142B -0.19909

133B ->144B -0.11611

134B ->142B 0.17877

134B ->144B -0.30967

135B ->143B 0.36860

137B ->144B -0.15673

138B ->143B -0.16332

140B ->149B 0.19016

141B ->150B 0.20176

Excited State 13: 3.254-A 3.3140 eV 374.12 nm f=0.0000 <S\*\*2>=2.396

135A ->143A -0.31962

136A ->144A 0.32703

137A ->143A -0.14462

138A ->144A 0.18457

140A ->150A -0.18060

141A ->144A -0.20278

142A ->144A -0.22858

142A ->149A 0.18114

134B ->143B 0.29795

135B ->142B 0.11694

135B ->144B -0.32719

137B ->143B 0.15050

138B ->142B 0.19162

138B ->144B 0.17182

139B ->143B -0.11325

140B ->143B -0.14757

140B ->150B 0.17918

141B ->149B 0.17013

Excited State 14: 2.196-A 3.3708 eV 367.82 nm f=0.1941 <S\*\*2>=0.956

140A ->144A 0.16519

141A ->143A -0.26956

142A ->143A 0.23373

|             |          |
|-------------|----------|
| 133B ->142B | 0.66612  |
| 134B ->142B | -0.24315 |
| 134B ->144B | -0.11823 |
| 135B ->143B | 0.12577  |
| 137B ->142B | -0.14607 |
| 139B ->142B | -0.21326 |
| 140B ->144B | 0.15268  |
| 141B ->143B | -0.36010 |

Excited State 15: 2.984-A 3.3861 eV 366.16 nm f=0.0000 <S\*\*2>=1.976

|             |          |
|-------------|----------|
| 134A ->145A | -0.12036 |
| 135A ->143A | 0.16847  |
| 136A ->144A | -0.16725 |
| 137A ->146A | -0.16189 |
| 138A ->148A | 0.14830  |
| 139A ->146A | 0.11087  |
| 139A ->147A | 0.24205  |
| 141A ->144A | -0.12825 |
| 141A ->145A | 0.14941  |
| 141A ->148A | 0.19154  |
| 142A ->144A | -0.12416 |
| 117B ->142B | 0.13463  |
| 130B ->142B | 0.10914  |
| 134B ->143B | -0.14779 |
| 135B ->144B | 0.17528  |
| 136B ->142B | -0.14700 |
| 136B ->145B | -0.18380 |



|             |          |
|-------------|----------|
| 137B ->146B | 0.15674  |
| 138B ->142B | 0.49333  |
| 138B ->148B | 0.20636  |
| 139B ->146B | -0.12130 |
| 139B ->147B | -0.22775 |
| 141B ->142B | 0.14584  |

Excited State 16: 2.028-A 3.4631 eV 358.01 nm f=0.0000 <S\*\*2>=0.778

|             |          |
|-------------|----------|
| 140A ->143A | -0.35734 |
| 141A ->144A | 0.50856  |
| 142A ->144A | -0.36474 |
| 140B ->143B | -0.27502 |
| 141B ->144B | 0.60064  |

Excited State 17: 2.878-A 3.5499 eV 349.26 nm f=0.0906 <S\*\*2>=1.820

|             |          |
|-------------|----------|
| 134A ->143A | 0.10212  |
| 134A ->146A | 0.13225  |
| 134A ->147A | 0.10372  |
| 137A ->145A | 0.17905  |
| 138A ->146A | 0.12696  |
| 138A ->147A | -0.15106 |
| 139A ->145A | -0.12140 |
| 139A ->148A | -0.24110 |
| 140A ->144A | -0.18009 |
| 141A ->143A | 0.30745  |
| 141A ->146A | -0.15082 |
| 141A ->147A | -0.21334 |

|             |          |
|-------------|----------|
| 133B ->142B | 0.30636  |
| 134B ->142B | -0.15881 |
| 136B ->146B | 0.21694  |
| 137B ->142B | -0.13994 |
| 137B ->145B | -0.18711 |
| 138B ->143B | -0.11879 |
| 138B ->147B | -0.21970 |
| 139B ->142B | -0.26112 |
| 139B ->144B | 0.12901  |
| 139B ->148B | 0.25146  |
| 141B ->143B | 0.28655  |

Excited State 18: 2.373-A 3.6153 eV 342.94 nm f=0.2530 <S\*\*2>=1.158

|             |          |
|-------------|----------|
| 137A ->145A | -0.11389 |
| 139A ->148A | 0.15095  |
| 141A ->143A | 0.29257  |
| 141A ->147A | 0.11733  |
| 142A ->143A | -0.32880 |
| 133B ->142B | 0.29794  |
| 134B ->142B | -0.39269 |
| 136B ->146B | -0.12712 |
| 137B ->142B | -0.15085 |
| 137B ->145B | 0.11139  |
| 138B ->147B | 0.12959  |
| 139B ->142B | 0.32769  |
| 139B ->148B | -0.14652 |
| 141B ->143B | 0.43119  |

Excited State 19: 2.536-A 3.6677 eV 338.04 nm f=0.0000 <S\*\*2>=1.358

|             |          |
|-------------|----------|
| 134A ->145A | 0.11084  |
| 137A ->146A | 0.15782  |
| 138A ->145A | 0.10363  |
| 138A ->148A | -0.10190 |
| 139A ->147A | -0.14963 |
| 141A ->145A | -0.11485 |
| 141A ->148A | -0.10532 |
| 136B ->142B | 0.18242  |
| 136B ->145B | 0.16560  |
| 137B ->146B | -0.15377 |
| 138B ->142B | 0.77281  |
| 138B ->148B | -0.15803 |
| 139B ->143B | 0.15625  |
| 139B ->147B | 0.15440  |
| 140B ->143B | 0.11409  |

Excited State 20: 2.159-A 3.7758 eV 328.36 nm f=0.0187 <S\*\*2>=0.916

|             |         |
|-------------|---------|
| 133B ->142B | 0.30402 |
| 137B ->142B | 0.89612 |
| 140B ->144B | 0.18112 |
| 141B ->143B | 0.15582 |

Excited State 21: 3.094-A 3.7888 eV 327.24 nm f=0.0000 <S\*\*2>=2.143

|             |          |
|-------------|----------|
| 140A ->143A | -0.13688 |
| 141A ->144A | -0.14632 |

142A ->144A 0.20025  
136B ->142B -0.27014  
140B ->143B 0.73595  
141B ->144B 0.51142

Excited State 22: 3.270-A 3.8046 eV 325.88 nm f=0.0088 <S\*\*2>=2.424

140A ->144A -0.27900  
141A ->143A -0.23978  
142A ->143A 0.27243  
134B ->142B 0.13511  
137B ->142B -0.21481  
140B ->144B 0.70167  
141B ->143B 0.43211

Excited State 23: 2.193-A 3.8392 eV 322.95 nm f=0.0000 <S\*\*2>=0.952

139A ->147A 0.11252  
140A ->143A 0.22502  
142A ->144A -0.13186  
135B ->142B -0.20912  
136B ->142B 0.80918  
138B ->148B 0.10174  
139B ->143B -0.11029  
140B ->143B 0.28479  
141B ->144B 0.17324

Excited State 24: 2.538-A 3.8459 eV 322.38 nm f=0.0000 <S\*\*2>=1.360

140A ->143A 0.75527

141A ->144A 0.33883  
142A ->144A -0.38644  
136B ->142B -0.30752  
140B ->143B 0.18972

Excited State 25: 2.249-A 3.8482 eV 322.18 nm f=0.0022 <S\*\*2>=1.015

140A ->144A 0.59136  
141A ->143A 0.23494  
142A ->143A -0.33811  
133B ->142B 0.22695  
134B ->142B 0.56154  
137B ->142B -0.14909  
140B ->144B 0.23625

Excited State 26: 2.145-A 3.9058 eV 317.44 nm f=0.0000 <S\*\*2>=0.900

140A ->150A 0.11019  
113B ->142B 0.17939  
124B ->142B 0.15312  
129B ->142B 0.13703  
131B ->142B -0.10542  
135B ->142B 0.87075  
136B ->142B 0.20046

Excited State 27: 2.126-A 3.9158 eV 316.62 nm f=0.1502 <S\*\*2>=0.880

140A ->144A -0.52603  
133B ->142B 0.37602  
134B ->142B 0.58198

140B ->144B -0.39153

Excited State 28: 3.412-A 4.0842 eV 303.57 nm f=0.0008 <S\*\*2>=2.661

135A ->144A -0.14602

136A ->143A 0.18110

138A ->143A 0.10385

139A ->144A 0.17554

140A ->149A -0.33696

140A ->151A 0.13345

141A ->150A -0.16042

142A ->150A 0.37285

134B ->142B 0.13819

134B ->144B 0.15221

135B ->143B -0.18026

138B ->143B 0.14824

139B ->144B -0.21800

140B ->149B 0.34504

140B ->151B -0.12958

141B ->150B 0.40385

Excited State 29: 3.382-A 4.0919 eV 303.00 nm f=0.0000 <S\*\*2>=2.609

135A ->143A 0.14827

136A ->144A -0.18085

139A ->143A -0.16969

140A ->150A -0.36220

141A ->149A -0.15001

142A ->149A 0.33535

142A ->151A -0.12847  
134B ->143B -0.15685  
135B ->142B 0.17801  
135B ->144B 0.18405  
137B ->143B -0.10243  
138B ->144B -0.12198  
139B ->143B 0.19691  
140B ->150B 0.37652  
141B ->149B 0.37486  
141B ->151B -0.13643  
141B ->153B 0.10388

Excited State 30: 2.989-A 4.2040 eV 294.92 nm f=0.0000 <S\*\*2>=1.984

135A ->143A -0.11447  
137A ->146A -0.12909  
138A ->145A -0.10662  
134B ->143B 0.17711  
135B ->144B -0.13050  
136B ->144B 0.14381  
136B ->145B -0.12459  
137B ->146B 0.11073  
138B ->144B -0.27929  
139B ->143B 0.80139

Excited State 31: 3.053-A 4.2215 eV 293.70 nm f=0.0314 <S\*\*2>=2.080

135A ->144A -0.10908  
137A ->145A -0.11647

139A ->144A -0.10691  
141A ->146A 0.10460  
134B ->144B 0.19916  
135B ->143B -0.17581  
136B ->143B 0.13283  
136B ->146B -0.12552  
137B ->145B 0.10633  
138B ->143B -0.32583  
139B ->144B 0.76427  
141B ->150B 0.11557

Excited State 32: 2.649-A 4.3083 eV 287.78 nm f=0.0000 <S\*\*2>=1.504

134A ->144A -0.18482  
135A ->143A 0.10124  
139A ->143A 0.88366  
136B ->145B 0.10753  
137B ->146B -0.10045  
139B ->143B 0.17518

Excited State 33: 2.703-A 4.3229 eV 286.81 nm f=0.0235 <S\*\*2>=1.576

134A ->143A -0.14430  
138A ->143A 0.14780  
139A ->144A 0.76178  
139A ->145A -0.18850  
141A ->146A -0.23972  
142A ->146A -0.10215  
136B ->143B 0.10768



138B ->143B -0.12581  
138B ->146B -0.12133  
139B ->144B 0.21688  
139B ->145B 0.18104

Excited State 34: 3.288-A 4.3470 eV 285.22 nm f=0.0000 <S\*\*2>=2.453

134A ->145A -0.14858  
137A ->143A -0.13582  
137A ->147A -0.14919  
138A ->144A -0.13725  
138A ->148A -0.17481  
139A ->146A 0.35941  
139A ->147A -0.13236  
141A ->145A 0.45780  
141A ->148A -0.12427  
142A ->145A 0.16399  
136B ->142B 0.16800  
136B ->144B -0.12544  
136B ->148B -0.14635  
137B ->143B 0.15328  
137B ->147B 0.16906  
138B ->144B -0.12757  
138B ->145B 0.28669  
138B ->148B -0.11858  
139B ->146B -0.33962  
139B ->147B 0.14714  
141B ->145B -0.21754

Excited State 35: 3.217-A 4.3698 eV 283.73 nm f=0.0147 <S\*\*2>=2.338

|             |          |
|-------------|----------|
| 134A ->143A | -0.16515 |
| 134A ->146A | -0.10852 |
| 135A ->144A | 0.10390  |
| 137A ->144A | -0.11289 |
| 137A ->148A | -0.16789 |
| 138A ->146A | 0.15856  |
| 138A ->147A | -0.17427 |
| 139A ->144A | 0.43809  |
| 139A ->145A | 0.30797  |
| 139A ->148A | -0.10470 |
| 141A ->146A | 0.36340  |
| 142A ->146A | 0.11177  |
| 136B ->143B | -0.15102 |
| 136B ->147B | -0.15732 |
| 137B ->144B | 0.12495  |
| 137B ->148B | 0.16710  |
| 138B ->146B | 0.25591  |
| 138B ->147B | -0.14167 |
| 139B ->145B | -0.31051 |
| 141B ->146B | -0.17221 |

Excited State 36: 3.359-A 4.4986 eV 275.60 nm f=0.0047 <S\*\*2>=2.570

|             |          |
|-------------|----------|
| 134A ->147A | -0.13037 |
| 136A ->146A | -0.12763 |
| 137A ->145A | 0.28570  |

|             |          |
|-------------|----------|
| 138A ->143A | 0.16534  |
| 138A ->146A | 0.27887  |
| 139A ->144A | -0.18677 |
| 139A ->148A | 0.23618  |
| 141A ->147A | 0.34815  |
| 142A ->147A | 0.13600  |
| 134B ->145B | 0.12047  |
| 136B ->143B | 0.11617  |
| 136B ->146B | 0.28565  |
| 136B ->147B | -0.14996 |
| 137B ->145B | -0.30773 |
| 138B ->143B | 0.20001  |
| 138B ->146B | 0.14926  |
| 138B ->147B | 0.14599  |
| 139B ->144B | 0.18301  |
| 139B ->148B | -0.22958 |
| 141B ->147B | -0.15570 |

Excited State 37: 3.277-A 4.5174 eV 274.46 nm f=0.0000 <S\*\*2>=2.435

|             |          |
|-------------|----------|
| 134A ->148A | 0.12984  |
| 136A ->145A | 0.11111  |
| 137A ->146A | -0.26305 |
| 137A ->147A | 0.10315  |
| 138A ->145A | -0.25729 |
| 139A ->143A | 0.20189  |
| 139A ->147A | -0.22776 |
| 141A ->148A | -0.31088 |

|             |          |
|-------------|----------|
| 142A ->148A | -0.11603 |
| 132B ->144B | -0.12801 |
| 133B ->143B | 0.39062  |
| 134B ->143B | -0.21065 |
| 136B ->145B | -0.26609 |
| 136B ->148B | 0.11341  |
| 137B ->146B | 0.26872  |
| 137B ->147B | -0.10309 |
| 138B ->145B | -0.14017 |
| 138B ->148B | -0.15599 |
| 139B ->146B | 0.10342  |
| 139B ->147B | 0.21952  |
| 141B ->148B | 0.15208  |

Excited State 38: 2.987-A 4.5244 eV 274.04 nm f=0.0000 <S\*\*2>=1.980

|             |          |
|-------------|----------|
| 135A ->143A | -0.13348 |
| 137A ->146A | 0.13325  |
| 138A ->145A | 0.13174  |
| 139A ->147A | 0.11818  |
| 141A ->148A | 0.15969  |
| 132B ->142B | 0.19448  |
| 132B ->144B | -0.24550 |
| 133B ->143B | 0.64330  |
| 134B ->143B | -0.25084 |
| 136B ->145B | 0.13237  |
| 137B ->143B | -0.20749 |
| 137B ->146B | -0.13222 |

138B ->144B 0.13925  
139B ->143B 0.19055  
139B ->147B -0.10725

Excited State 39: 2.914-A 4.5667 eV 271.49 nm f=0.0192 <S\*\*2>=1.873

133A ->144A -0.10533  
132B ->143B -0.31486  
133B ->144B 0.71543  
134B ->144B -0.26651  
137B ->144B -0.17862  
138B ->143B 0.33615  
139B ->144B 0.27297

Excited State 40: 2.649-A 4.6124 eV 268.81 nm f=0.0912 <S\*\*2>=1.505

135A ->144A 0.16188  
136A ->143A -0.12445  
138A ->143A -0.20676  
141A ->147A -0.13362  
133B ->144B -0.29880  
134B ->144B 0.22054  
138B ->143B 0.75763  
139B ->144B 0.29641

Excited State 41: 2.412-A 4.6221 eV 268.24 nm f=0.0000 <S\*\*2>=1.204

135A ->143A 0.16449  
136A ->144A -0.18220  
137A ->143A 0.13075

|             |          |
|-------------|----------|
| 138A ->144A | -0.10156 |
| 109B ->142B | 0.14734  |
| 112B ->142B | 0.16749  |
| 121B ->142B | 0.13883  |
| 125B ->142B | 0.15689  |
| 129B ->142B | 0.15029  |
| 131B ->142B | 0.12290  |
| 132B ->142B | -0.37735 |
| 133B ->143B | 0.14656  |
| 135B ->144B | -0.10126 |
| 138B ->144B | 0.62471  |
| 139B ->143B | 0.28385  |

Excited State 42: 3.130-A 4.6453 eV 266.90 nm f=0.0100 <S\*\*2>=2.199

|             |          |
|-------------|----------|
| 135A ->144A | -0.16348 |
| 136A ->143A | -0.12891 |
| 137A ->144A | 0.37960  |
| 137A ->148A | 0.12323  |
| 138A ->143A | 0.69414  |
| 139A ->145A | 0.13482  |
| 139A ->148A | -0.11983 |
| 141A ->146A | 0.21301  |
| 141A ->147A | -0.22300 |
| 133B ->144B | -0.10054 |
| 135B ->143B | 0.13027  |
| 136B ->143B | 0.14160  |
| 137B ->144B | -0.17379 |

Excited State 43: 2.911-A 4.6494 eV 266.67 nm f=0.0000 <S\*\*2>=1.869

|             |          |
|-------------|----------|
| 135A ->143A | -0.11074 |
| 136A ->144A | -0.15182 |
| 137A ->143A | 0.43797  |
| 138A ->144A | 0.34213  |
| 139A ->146A | 0.10385  |
| 141A ->145A | 0.17346  |
| 142A ->145A | 0.10204  |
| 109B ->142B | 0.10404  |
| 112B ->142B | 0.11851  |
| 125B ->142B | 0.10674  |
| 129B ->142B | 0.10613  |
| 132B ->142B | -0.26531 |
| 133B ->143B | 0.19027  |
| 135B ->144B | -0.13021 |
| 136B ->144B | 0.25447  |
| 137B ->143B | -0.19307 |
| 138B ->144B | -0.38322 |
| 139B ->143B | -0.22125 |

Excited State 44: 3.004-A 4.6576 eV 266.20 nm f=0.0000 <S\*\*2>=2.006

|             |          |
|-------------|----------|
| 135A ->143A | -0.13073 |
| 137A ->143A | 0.33066  |
| 138A ->144A | 0.36778  |
| 139A ->147A | -0.12322 |
| 141A ->145A | 0.16669  |

|             |          |
|-------------|----------|
| 141A ->148A | -0.21721 |
| 142A ->148A | -0.10423 |
| 109B ->142B | -0.11997 |
| 112B ->142B | -0.13512 |
| 121B ->142B | -0.10906 |
| 125B ->142B | -0.11389 |
| 129B ->142B | -0.11664 |
| 132B ->142B | 0.29764  |
| 133B ->143B | -0.26712 |
| 135B ->144B | 0.17638  |
| 137B ->143B | -0.18568 |
| 138B ->144B | 0.43561  |

Excited State 45: 2.948-A 4.6983 eV 263.89 nm f=0.1273 <S\*\*2>=1.923

|             |          |
|-------------|----------|
| 133A ->144A | -0.23351 |
| 134A ->143A | 0.21238  |
| 135A ->144A | 0.12975  |
| 136A ->143A | -0.26201 |
| 137A ->144A | 0.23040  |
| 138A ->143A | -0.23142 |
| 139A ->144A | 0.17257  |
| 142A ->150A | 0.13619  |
| 133B ->144B | 0.13999  |
| 134B ->144B | 0.28332  |
| 135B ->143B | -0.26885 |
| 136B ->143B | 0.47234  |
| 137B ->144B | -0.16597 |



139B ->144B -0.19519  
139B ->145B -0.10983  
141B ->146B -0.14459

Excited State 46: 2.396-A 4.7059 eV 263.46 nm f=0.0000 <S\*\*2>=1.186

133A ->143A 0.15186  
134A ->144A -0.11416  
137A ->143A 0.21727  
138A ->144A 0.41633  
139A ->143A -0.10586  
134B ->143B -0.26187  
136B ->144B -0.48488  
137B ->143B 0.52149  
138B ->144B -0.12188  
138B ->145B -0.10722  
139B ->146B 0.13406  
141B ->145B 0.16881

Excited State 47: 2.406-A 4.7181 eV 262.78 nm f=0.0000 <S\*\*2>=1.197

133A ->143A -0.34111  
134A ->144A 0.26344  
135A ->143A 0.14711  
136A ->144A -0.23217  
137A ->143A 0.36510  
138A ->144A -0.27568  
139A ->143A 0.15575  
141A ->144A -0.12736

142A ->145A -0.13011  
142A ->149A -0.12292  
125B ->142B -0.10593  
131B ->142B -0.10546  
132B ->142B 0.24140  
134B ->143B 0.19282  
135B ->144B -0.25102  
137B ->143B 0.34540  
141B ->145B 0.11369

Excited State 48: 2.164-A 4.7198 eV 262.69 nm f=0.1760 <S\*\*2>=0.921

135A ->144A 0.12063  
136A ->143A -0.32693  
137A ->144A 0.39267  
138A ->143A 0.13640  
133B ->144B 0.11753  
135B ->143B -0.30444  
136B ->143B -0.45075  
137B ->144B 0.51034  
139B ->145B 0.12592  
141B ->147B -0.10162

Excited State 49: 2.575-A 4.7960 eV 258.51 nm f=0.0955 <S\*\*2>=1.408

130A ->144A -0.15378  
131A ->143A 0.18110  
133A ->144A -0.33429  
134A ->143A 0.41188

|             |          |
|-------------|----------|
| 135A ->144A | -0.24899 |
| 136A ->143A | 0.13937  |
| 139A ->144A | 0.17741  |
| 142A ->152A | -0.11530 |
| 128B ->144B | 0.15097  |
| 130B ->143B | -0.15592 |
| 131B ->143B | 0.12644  |
| 132B ->143B | 0.10515  |
| 133B ->144B | -0.26248 |
| 135B ->143B | 0.31221  |
| 135B ->152B | -0.10579 |
| 136B ->143B | -0.17386 |
| 137B ->144B | 0.15626  |
| 141B ->150B | 0.11907  |
| 141B ->152B | -0.10661 |

Excited State 50: 2.672-A 4.7974 eV 258.44 nm f=0.0000 <S\*\*2>=1.535

|             |          |
|-------------|----------|
| 130A ->143A | -0.16738 |
| 131A ->144A | 0.20015  |
| 133A ->143A | -0.29709 |
| 134A ->144A | 0.31413  |
| 135A ->143A | -0.26187 |
| 136A ->144A | 0.15416  |
| 139A ->143A | 0.12332  |
| 140A ->152A | -0.13485 |
| 142A ->145A | 0.16421  |
| 142A ->148A | 0.14434  |

|             |          |
|-------------|----------|
| 142A ->153A | 0.11646  |
| 128B ->143B | 0.16658  |
| 130B ->144B | -0.15758 |
| 131B ->144B | 0.11632  |
| 132B ->142B | -0.16039 |
| 133B ->143B | -0.23591 |
| 134B ->143B | -0.17847 |
| 135B ->144B | 0.28139  |
| 135B ->153B | 0.10306  |
| 136B ->144B | -0.11802 |
| 137B ->143B | 0.12336  |
| 138B ->144B | 0.11725  |
| 140B ->150B | -0.10066 |
| 141B ->149B | -0.16612 |

Excited State 51: 3.189-A 4.8321 eV 256.58 nm f=0.0220 <S\*\*2>=2.292

|             |          |
|-------------|----------|
| 130A ->144A | -0.17960 |
| 131A ->143A | 0.20307  |
| 132A ->143A | -0.11377 |
| 133A ->144A | 0.32938  |
| 134A ->143A | -0.28135 |
| 135A ->144A | 0.10803  |
| 135A ->153A | 0.10668  |
| 136A ->143A | -0.15290 |
| 136A ->152A | 0.10704  |
| 137A ->144A | -0.24328 |
| 138A ->143A | 0.18018  |

|             |          |
|-------------|----------|
| 140A ->149A | -0.10137 |
| 140A ->153A | 0.15033  |
| 141A ->146A | -0.10461 |
| 142A ->146A | -0.14237 |
| 142A ->152A | -0.22920 |
| 128B ->142B | -0.11905 |
| 128B ->144B | 0.16795  |
| 130B ->143B | -0.17185 |
| 131B ->143B | 0.13851  |
| 135B ->152B | -0.11625 |
| 137B ->144B | 0.17026  |
| 140B ->153B | -0.16235 |
| 141B ->146B | -0.12624 |
| 141B ->152B | -0.24849 |

Excited State 52: 3.108-A 4.8329 eV 256.54 nm f=0.0002 <S\*\*2>=2.165

|             |          |
|-------------|----------|
| 130A ->143A | 0.17361  |
| 131A ->144A | -0.18956 |
| 133A ->143A | -0.29482 |
| 134A ->144A | 0.21928  |
| 135A ->143A | -0.16999 |
| 135A ->152A | 0.10300  |
| 136A ->144A | 0.21418  |
| 137A ->143A | 0.14017  |
| 138A ->144A | -0.24840 |
| 140A ->152A | 0.15145  |
| 142A ->145A | 0.30675  |

|             |          |
|-------------|----------|
| 142A ->148A | -0.11071 |
| 142A ->153A | -0.14824 |
| 128B ->143B | -0.17274 |
| 130B ->144B | 0.16269  |
| 131B ->144B | -0.14521 |
| 135B ->153B | -0.10278 |
| 137B ->143B | -0.19057 |
| 138B ->144B | -0.10707 |
| 140B ->152B | -0.18514 |
| 141B ->145B | 0.14189  |
| 141B ->148B | -0.12569 |
| 141B ->153B | -0.17532 |

Excited State 53: 2.893-A 4.8706 eV 254.55 nm f=0.0000 <S\*\*2>=1.843

|             |          |
|-------------|----------|
| 133A ->143A | 0.17959  |
| 134A ->144A | -0.10509 |
| 135A ->143A | 0.12076  |
| 140A ->150A | 0.10225  |
| 141A ->145A | 0.13357  |
| 141A ->149A | 0.11176  |
| 142A ->145A | 0.67448  |
| 142A ->148A | 0.17456  |
| 132B ->142B | 0.11263  |
| 136B ->144B | 0.10521  |
| 141B ->145B | 0.47862  |
| 141B ->148B | 0.13308  |

Excited State 54: 2.092-A 4.9172 eV 252.14 nm f=0.0000 <S\*\*2>=0.844

137A ->143A -0.15293

139A ->146A 0.13314

141A ->145A 0.33955

142A ->145A -0.48953

142A ->148A -0.17312

137B ->143B -0.13294

141B ->145B 0.68594

Excited State 55: 2.944-A 4.9295 eV 251.52 nm f=0.0000 <S\*\*2>=1.917

133A ->143A -0.41670

134A ->144A 0.10601

135A ->143A 0.27799

136A ->144A -0.26088

137A ->143A -0.48166

138A ->144A 0.48842

140A ->152A 0.12912

142A ->145A 0.16308

142A ->148A -0.16010

142A ->153A -0.10015

140B ->152B -0.12708

141B ->148B -0.16636

141B ->153B -0.10279

Excited State 56: 3.119-A 4.9335 eV 251.31 nm f=0.0222 <S\*\*2>=2.181

135A ->144A 0.14902

136A ->143A -0.16367

137A ->144A -0.39609  
138A ->143A 0.12833  
141A ->146A 0.12207  
142A ->146A 0.55434  
142A ->147A 0.15655  
142A ->152A 0.10995  
136B ->143B 0.20812  
137B ->144B 0.15052  
141B ->146B 0.47058  
141B ->152B 0.10569

Excited State 57: 2.819-A 4.9392 eV 251.02 nm f=0.0169 <S\*\*2>=1.737

133A ->144A 0.35540  
134A ->143A -0.13802  
135A ->144A -0.23549  
136A ->143A 0.19122  
137A ->144A 0.50221  
138A ->143A -0.32961  
141A ->147A 0.10396  
142A ->146A 0.32590  
142A ->147A 0.36926  
141B ->146B 0.16358  
141B ->147B 0.19544

Excited State 58: 2.629-A 4.9589 eV 250.02 nm f=0.0000 <S\*\*2>=1.478

133A ->143A 0.11738  
138A ->144A -0.12563



142A ->148A -0.18129  
134B ->143B -0.24377  
135B ->144B 0.18619  
136B ->144B 0.68604  
137B ->143B 0.49439  
140B ->152B -0.11003  
141B ->148B -0.15350

Excited State 59: 2.598-A 4.9590 eV 250.02 nm f=0.0015 <S\*\*2>=1.437

137A ->144A 0.13217  
142A ->146A -0.14836  
142A ->147A -0.13922  
134B ->144B -0.29264  
135B ->143B 0.16013  
136B ->143B 0.58050  
137B ->144B 0.64220

Excited State 60: 2.555-A 4.9792 eV 249.00 nm f=0.0436 <S\*\*2>=1.383

133A ->144A -0.21578  
134A ->143A 0.12726  
138A ->143A 0.23998  
138A ->146A -0.11042  
138A ->147A -0.11668  
139A ->145A -0.13063  
141A ->146A -0.24920  
141A ->147A 0.12882  
142A ->146A 0.17484

142A ->147A 0.52227  
140B ->145B -0.12287  
141B ->146B -0.51886  
141B ->147B 0.25497

Excited State 61: 3.176-A 4.9933 eV 248.30 nm f=0.0000 <S\*\*2>=2.272

130A ->143A 0.15731  
131A ->144A -0.19435  
133A ->143A -0.24622  
134A ->144A 0.11900  
135A ->143A 0.12090  
138A ->144A 0.18817  
140A ->152A -0.13875  
142A ->145A -0.15578  
142A ->148A 0.50310  
128B ->143B -0.14865  
130B ->144B 0.13862  
131B ->144B -0.14396  
134B ->143B -0.18962  
136B ->144B 0.28791  
137B ->143B 0.13449  
140B ->152B 0.13800  
141B ->148B 0.33775  
141B ->153B 0.10143

Excited State 62: 2.520-A 5.0044 eV 247.75 nm f=0.0571 <S\*\*2>=1.338

133A ->144A -0.10569

|             |          |
|-------------|----------|
| 140A ->145A | 0.13818  |
| 141A ->146A | 0.14987  |
| 141A ->147A | 0.15422  |
| 142A ->146A | -0.54322 |
| 142A ->147A | 0.21697  |
| 135B ->143B | -0.10964 |
| 141B ->146B | 0.40916  |
| 141B ->147B | 0.55163  |

Excited State 63: 3.282-A 5.0263 eV 246.67 nm f=0.0028 <S\*\*2>=2.442

|             |          |
|-------------|----------|
| 130A ->144A | -0.15683 |
| 131A ->143A | 0.21115  |
| 134A ->143A | -0.17209 |
| 137A ->144A | 0.14804  |
| 137A ->148A | -0.12503 |
| 138A ->147A | -0.12175 |
| 140A ->148A | -0.16532 |
| 140A ->153A | -0.22289 |
| 141A ->146A | -0.16280 |
| 141A ->147A | 0.10962  |
| 141A ->152A | -0.11630 |
| 142A ->146A | -0.10062 |
| 142A ->147A | -0.12358 |
| 142A ->152A | 0.32106  |
| 128B ->144B | 0.15291  |
| 130B ->143B | -0.13294 |
| 131B ->143B | 0.18481  |

|             |         |
|-------------|---------|
| 134B ->144B | 0.17043 |
| 135B ->143B | 0.11858 |
| 140B ->148B | 0.19958 |
| 140B ->153B | 0.23194 |
| 141B ->147B | 0.11596 |
| 141B ->152B | 0.38047 |

Excited State 64: 2.198-A 5.0498 eV 245.52 nm f=0.0036 <S\*\*2>=0.958

|             |          |
|-------------|----------|
| 139A ->148A | 0.10640  |
| 140A ->145A | -0.12542 |
| 140A ->148A | 0.10827  |
| 141A ->147A | 0.19996  |
| 142A ->146A | 0.27092  |
| 142A ->147A | -0.57202 |
| 137B ->148B | -0.10905 |
| 140B ->145B | -0.12270 |
| 141B ->146B | -0.12251 |
| 141B ->147B | 0.60705  |

Excited State 65: 3.067-A 5.0631 eV 244.88 nm f=0.0000 <S\*\*2>=2.102

|             |          |
|-------------|----------|
| 133A ->143A | 0.10127  |
| 134A ->144A | 0.17194  |
| 135A ->147A | -0.10862 |
| 136A ->144A | -0.20103 |
| 136A ->148A | -0.10109 |
| 137A ->143A | -0.31796 |
| 137A ->146A | 0.15858  |

|             |          |
|-------------|----------|
| 137A ->147A | 0.27367  |
| 138A ->145A | 0.14703  |
| 138A ->148A | 0.25517  |
| 140A ->152A | -0.13552 |
| 141A ->145A | 0.34248  |
| 141A ->148A | -0.15354 |
| 142A ->148A | -0.14669 |
| 142A ->153A | 0.11771  |
| 134B ->143B | -0.10133 |
| 136B ->145B | 0.12830  |
| 137B ->147B | -0.11677 |
| 138B ->145B | -0.14672 |
| 138B ->148B | 0.11731  |
| 139B ->146B | 0.18908  |
| 139B ->147B | -0.12740 |
| 140B ->152B | 0.15898  |
| 141B ->145B | -0.25689 |
| 141B ->151B | -0.10292 |
| 141B ->153B | 0.12056  |

Excited State 66: 2.532-A 5.0735 eV 244.38 nm f=0.0000 <S\*\*2>=1.352

|             |          |
|-------------|----------|
| 133A ->143A | 0.13522  |
| 134A ->144A | 0.13849  |
| 135A ->143A | -0.12955 |
| 136A ->144A | -0.17412 |
| 140A ->146A | 0.12909  |
| 141A ->145A | 0.25257  |

142A ->145A -0.11043  
142A ->148A 0.61968  
138B ->145B -0.11168  
138B ->148B -0.11453  
139B ->146B 0.13799  
140B ->152B -0.13894  
141B ->148B -0.46215  
141B ->153B -0.10908

Excited State 67: 2.885-A 5.0759 eV 244.26 nm f=0.0003 <S\*\*2>=1.831

133A ->144A -0.42517  
134A ->143A -0.35675  
135A ->144A 0.39293  
136A ->143A 0.47539  
137A ->144A 0.23396  
137A ->148A -0.10597  
138A ->143A 0.15869  
141A ->146A -0.13834  
142A ->146A 0.12632  
142A ->147A -0.13331  
141B ->146B 0.14432  
141B ->152B -0.12667

Excited State 68: 2.664-A 5.0868 eV 243.74 nm f=0.0000 <S\*\*2>=1.525

133A ->143A -0.26510  
134A ->144A -0.35602  
135A ->143A 0.37528

|             |          |
|-------------|----------|
| 136A ->144A | 0.49803  |
| 137A ->143A | 0.10752  |
| 140A ->152A | -0.10483 |
| 141A ->145A | 0.11203  |
| 141A ->148A | -0.30986 |
| 141B ->148B | -0.38177 |

Excited State 69: 2.632-A 5.1066 eV 242.79 nm f=0.0000 <S\*\*2>=1.482

|             |          |
|-------------|----------|
| 133A ->143A | -0.14597 |
| 134A ->144A | -0.18855 |
| 134A ->145A | 0.10658  |
| 135A ->143A | 0.14674  |
| 136A ->144A | 0.17020  |
| 139A ->146A | -0.11813 |
| 140A ->146A | 0.13014  |
| 140A ->152A | 0.13156  |
| 141A ->145A | 0.35840  |
| 141A ->148A | 0.27391  |
| 141A ->149A | 0.15940  |
| 142A ->149A | 0.11932  |
| 134B ->143B | 0.26549  |
| 135B ->144B | 0.26290  |
| 137B ->143B | 0.10591  |
| 139B ->146B | 0.12519  |
| 140B ->146B | -0.15894 |
| 140B ->147B | 0.10023  |
| 141B ->145B | -0.15851 |

141B ->148B 0.44337

141B ->149B 0.11292

Excited State 70: 3.007-A 5.1167 eV 242.31 nm f=0.0047 <S\*\*2>=2.011

134A ->143A 0.21225

135A ->144A -0.17282

136A ->143A -0.22176

136A ->147A 0.11297

137A ->145A -0.15267

137A ->148A -0.25516

138A ->143A 0.11036

138A ->146A -0.14434

138A ->147A -0.25532

141A ->146A -0.22134

141A ->147A 0.30721

142A ->147A -0.20216

132B ->143B 0.10669

134B ->144B -0.26510

135B ->143B -0.25709

136B ->146B -0.11127

137B ->144B -0.13074

137B ->148B 0.13649

138B ->147B -0.12936

139B ->145B -0.11133

140B ->145B 0.29915

141B ->146B 0.11247

141B ->147B -0.17849



Excited State 71: 3.027-A 5.1354 eV 241.43 nm f=0.0000 <S\*\*2>=2.040

|             |          |
|-------------|----------|
| 141A ->145A | -0.19262 |
| 141A ->148A | -0.21860 |
| 141A ->149A | -0.11502 |
| 132B ->144B | -0.18197 |
| 133B ->143B | 0.20299  |
| 134B ->143B | 0.50437  |
| 135B ->144B | 0.57095  |
| 137B ->143B | 0.20356  |
| 139B ->146B | -0.11987 |

Excited State 72: 3.103-A 5.1374 eV 241.34 nm f=0.0084 <S\*\*2>=2.157

|             |          |
|-------------|----------|
| 135A ->144A | -0.10033 |
| 136A ->143A | -0.16471 |
| 141A ->146A | -0.14196 |
| 128B ->144B | -0.10874 |
| 132B ->143B | -0.24505 |
| 133B ->144B | 0.19011  |
| 134B ->144B | 0.55770  |
| 135B ->143B | 0.52518  |
| 137B ->144B | 0.17438  |
| 139B ->145B | -0.12264 |
| 140B ->145B | 0.19647  |
| 141B ->146B | 0.10943  |

SavETr: write IOETrn= 770 NScale= 10 NData= 16 NLR=1 NState= 72 LETran= 1306.
